# Supplementary material for: The global epidemiology of viral-induced acute liver failure: a systematic review protocol
Source: PubMed Central journal article supplement — BMJ Open. 2019 Aug 30;9(8):e029819. doi: 10.1136/bmjopen-2019-029819 (PMC6720318; doi:10.1136/bmjopen-2019-029819), 2019-08-30
Supplement: bmjopen-2019-029819.draft_revisions.pdf [file bmjopen-2019-029819.draft_revisions.pdf]

# BMJ Open

BMJ Open is committed to open peer review. As part of this commitment we make the peer review history of every article we publish publicly available.

When an article is published we post the peer reviewers' comments and the authors' responses online. We also post the versions of the paper that were used during peer review. These are the versions that the peer review comments apply to.

The versions of the paper that follow are the versions that were submitted during the peer review process. They are not the versions of record or the final published versions. They should not be cited or distributed as the published version of this manuscript.

BMJ Open is an open access journal and the full, final, typeset and author-corrected version of record of the manuscript is available on our site with no access controls, subscription charges or pay-per-view fees (<http://bmjopen.bmj.com>).

If you have any questions on BMJ Open's open peer review process please email [info.bmjopen@bmj.com](mailto:info.bmjopen@bmj.com)

# BMJ Open

## A Systematic Review of the Global Epidemiology of Viral-Induced Acute Liver Failure

|                               |                                                                                                                                                                                                                                                                                                                                                                                                                                                                                                                                                                                                                                                                                                                                                                                                                                                                                                                                                                                                                                                                                                                                                                                                                                                                                                                                                                                                                                                                       |
|-------------------------------|-----------------------------------------------------------------------------------------------------------------------------------------------------------------------------------------------------------------------------------------------------------------------------------------------------------------------------------------------------------------------------------------------------------------------------------------------------------------------------------------------------------------------------------------------------------------------------------------------------------------------------------------------------------------------------------------------------------------------------------------------------------------------------------------------------------------------------------------------------------------------------------------------------------------------------------------------------------------------------------------------------------------------------------------------------------------------------------------------------------------------------------------------------------------------------------------------------------------------------------------------------------------------------------------------------------------------------------------------------------------------------------------------------------------------------------------------------------------------|
| Journal:                      | <i>BMJ Open</i>                                                                                                                                                                                                                                                                                                                                                                                                                                                                                                                                                                                                                                                                                                                                                                                                                                                                                                                                                                                                                                                                                                                                                                                                                                                                                                                                                                                                                                                       |
| Manuscript ID                 | bmjopen-2019-029819                                                                                                                                                                                                                                                                                                                                                                                                                                                                                                                                                                                                                                                                                                                                                                                                                                                                                                                                                                                                                                                                                                                                                                                                                                                                                                                                                                                                                                                   |
| Article Type:                 | Protocol                                                                                                                                                                                                                                                                                                                                                                                                                                                                                                                                                                                                                                                                                                                                                                                                                                                                                                                                                                                                                                                                                                                                                                                                                                                                                                                                                                                                                                                              |
| Date Submitted by the Author: | 14-Feb-2019                                                                                                                                                                                                                                                                                                                                                                                                                                                                                                                                                                                                                                                                                                                                                                                                                                                                                                                                                                                                                                                                                                                                                                                                                                                                                                                                                                                                                                                           |
| Complete List of Authors:     | <p>Patterson, Jenna; University of Cape Town, School of Public Health &amp; Family Medicine, Vaccines for Africa Initiative</p> <p>Githinji, Leah; University of Cape Town, Department of Paediatrics, Red Cross War Memorial Children's Hospital</p> <p>Abdullahi, Leila; Save the Children International, Research, Evaluation, Analysis, Learning and Monitoring (REALM)</p> <p>Silal, Sheetal; University of Cape Town, Department of Statistical Sciences; University of Oxford, Nuffield Department of Medicine</p> <p>Goddard, Liz; University of Cape Town, Department of Paediatrics, Red Cross War Memorial Children's Hospital</p> <p>Setshedi, Mashiko; University of Cape Town, Department of Medicine, Division of Gastroenterology, Grootte Schuur Hospital</p> <p>Spearman, Wendy ; University of Cape Town, Department of Medicine, Division of Hepatology, Grootte Schuur Hospital</p> <p>Hussey, Gregory; University of Cape Town, School of Public Health &amp; Family Medicine, Vaccines For Africa Initiative; University of Cape Town, Institute of Infectious Disease and Molecular Medicine</p> <p>Kagina, Benjamin; University of Cape Town, School of Public Health &amp; Family Medicine, Vaccines for Africa Initiative</p> <p>Muloiwa, Rudzani; University of Cape Town, School of Public Health &amp; Family Medicine, Vaccines for Africa Initiative; University of Cape Town, Department of Paediatrics, Grootte Schuur Hospital</p> |
| Keywords:                     | Epidemiology < INFECTIOUS DISEASES, acute liver failure, VIROLOGY                                                                                                                                                                                                                                                                                                                                                                                                                                                                                                                                                                                                                                                                                                                                                                                                                                                                                                                                                                                                                                                                                                                                                                                                                                                                                                                                                                                                     |
|                               |                                                                                                                                                                                                                                                                                                                                                                                                                                                                                                                                                                                                                                                                                                                                                                                                                                                                                                                                                                                                                                                                                                                                                                                                                                                                                                                                                                                                                                                                       |

SCHOLARONE™  
Manuscripts

# PROTOCOL

## A Systematic Review of the Global Epidemiology of Viral-Induced Acute Liver Failure

Jenna Patterson<sup>1,2</sup>, Leah Githinji<sup>3</sup>, Leila Abdullahi<sup>2,4</sup>, Sheetal Silal<sup>5,6,7</sup>, Liz Goddard<sup>3</sup>, Mashiko Setshedi<sup>8</sup>, Wendy Spearman<sup>9</sup>, Gregory D. Hussey<sup>1,10</sup>, Benjamin Kagina<sup>1,2</sup> and Rudzani Muloiwa<sup>1,11</sup>

<sup>1</sup>Vaccines for Africa Initiative, University of Cape Town, South Africa

<sup>2</sup>School of Public Health & Family Medicine, University of Cape Town, South Africa

<sup>3</sup>Department of Paediatrics & Child Health, Red Cross War Memorial Children's Hospital, University of Cape Town

<sup>4</sup>Save the Children International, Somalia/Somaliland Country Office, Nairobi, Kenya

<sup>5</sup>Modelling and Simulation Hub, Africa, Department of Statistical Sciences, Faculty of Science, University of Cape Town, South Africa

<sup>6</sup>Nuffield Department of Medicine, Oxford University, United Kingdom

<sup>7</sup>South African DST-NRF Centre of Excellence in Epidemiological Modelling and Analysis, Stellenbosch University, South Africa

<sup>7</sup>Department of Paediatrics & Child Health, Red Cross War Memorial Children's Hospital, University of Cape Town

<sup>8</sup>Department of Medicine, Division of Gastroenterology, Groote Schuur Hospital, University of Cape Town, South Africa

<sup>9</sup>Division of Hepatology, Department of Medicine, University of Cape Town, South Africa

<sup>10</sup>Institute of Infectious Disease and Molecular Medicine, University of Cape Town, South Africa

<sup>11</sup>Department of Paediatrics & Child Health, Groote Schuur Hospital, University of Cape Town

*Corresponding author:* Jenna Patterson

*Corresponding author's email address:* pttjen005@myuct.ac.za

*Corresponding author's postal address:* Vaccines for Africa Initiative, Room N2.09A, Werner Beit North, Health Sciences Campus, Anzio Road, Observatory, 7925

Patterson, J et al.

For peer review only - <http://bmjopen.bmj.com/site/about/guidelines.xhtml>

### **ABSTRACT**

**Objective:** This systematic review aims to describe the global epidemiology of viral-induced acute liver failure.

**Setting:** The global burden of viral-induced acute liver failure is largely unknown even with mortality rates associated with the disease varying between 60% and 80%, depending on the disease aetiology as well as a patient's access to care.

**Methods and analysis:** Electronic databases will be searched for relevant literature published from 2009 up to 2019. Published and unpublished case-series, cross-sectional, cohort and randomised control trials (RCT) and non-randomised control trials (nRCT) will be eligible for inclusion in this review. Qualifying studies will be formally assessed for quality and risk of bias using a scoring tool. Following standardised data extraction, meta-analyses will be carried out using STATA. Depending on characteristics of included studies, subgroup analyses will be performed. This review will be reported according to Preferred Reporting Items for Systematic reviews and Meta-Analyses (PRISMA) and Meta-analysis of Observational Studies in Epidemiology (MOOSE) guidelines.

**Conclusions:** Establishing the common aetiologies of viral-induced acute liver failure, which vary geographically, is important so that: a) treatment can be initiated quickly, b) contraindications to liver transplant can be identified, c) prognoses can be determined more accurately, and most importantly, d) vaccination against viral ALF aetiologies can be prioritized especially in under-resourced regions with public health risks associated with the relevant attributable diseases.

Ethics and dissemination:

**Trial Register:** This protocol has been registered with the International Prospective Register of Systematic Reviews (PROSPERO), registration number CRD42018110309.

**Key words:** global, epidemiology, acute liver failure

#### **Strengths and limitations of study:**

- Comprehensive and exhaustive search for relevant studies from several databases
- Comprehensive diagnostic inclusion criteria for acute liver failure cases according to international guidelines
- Paucity of data may lead to meta-analysis not being possible for all global regions
- Diversity of viruses attributable to ALF cases may lead to low statistical power in meta-analysis

## MAIN TEXT

### INTRODUCTION

Acute liver failure (ALF) refers to a rare syndrome characterized by an acute liver injury resulting in encephalopathy (altered mentation) and coagulopathy (International Normalized Ratio (INR) >1.5 ) in individuals without known pre-existing liver disease and with an illness of <26 weeks duration (1). The syndrome was originally defined as fulminant liver failure or fulminant hepatic failure in 1970 but was re-defined as ALF in the early 1990s when the understanding of the multiple disease aetiologies, frequency of complications and prognosis of the condition further developed (2). Further sub-classifications of ALF include hyperacute, acute and subacute depending on the time in weeks from the development of jaundice to the development of hepatic encephalopathy (3).

The pathogenesis of ALF includes both direct and immune-mediated liver injury triggered by the disease aetiology (4). The aetiology of ALF determines the clinical course and progression of the disease and well as the need for specific therapy (5). Possible causes of ALF include viral infections, drugs and toxins, pregnancy related liver diseases (acute fatty liver of pregnancy, HELLP syndrome, preeclampsia), vascular causes (Budd-Chiari syndrome, ischaemic hepatitis) and malignancy (lymphoma, haemophagocytic lymphohistiocytosis). Wilsons disease, vertically-acquired hepatitis B and autoimmune hepatitis are included despite being chronic liver diseases if the diagnosis is made within 26 weeks (6).

Acute viral hepatitis (particularly acute hepatitis A and acute E) has been identified as the most common cause of ALF among all ages in Asia and Africa and the most common causes of ALF in children in Asia and South America (2, 4). The incidence of virally induced ALF has substantially declined in Europe, with only 19% of all ALF cases now related to viral infection (2). Vaccination has led to a significant drop in the incidence of acute hepatitis B induced ALF, with fewer than 4% of ALF cases now attributable to hepatitis B infection in Europe (2). Since the introduction of a universal one-dose hepatitis A vaccination program in Argentina, the number of acute hepatitis A induced ALF cases has decreased from 54.6% to 27.7% (7).

The most common causes of death in patients with ALF are cerebral oedema and multi-organ system failure (4). Mortality rates associated with ALF vary between 60% and 80%, depending on the disease aetiology as well as a patient's access to care (8, 9). Liver transplantation plays a central role in the management of ALF and remains the only definitive treatment for patients who fail to demonstrate spontaneous recovery (1). It remains difficult to predict which ALF patients will require transplantation and models such as the "Model for End-stage Liver Disease" (MELD) have not improved the accuracy of these predictions (1). The King's College Criteria for emergency liver transplantation remains the most clinically useful, with a sensitivity of 68%-69% and a specificity of 82%-92% (10). Management of ALF cases accounts for 5-12% of all liver transplant activity in the United States and Europe (11). A large proportion of ALF patients in both high and low resource settings, however, are deemed to have

1  
2  
3 contraindications to transplantation or deteriorate beyond transplantation before a donor liver is allocated (5, 11,  
4 12).

5  
6  
7 The burden of viral-induced ALF around the world still remains unclear, with little to no data collected regarding  
8 the disease incidence in general (2). Epidemiological estimates around ALF are based purely on data from  
9 transplant units and the medical management of the condition remains poorly defined (1, 2). Establishing the  
10 common aetiologies of viral-induced ALF, which vary geographically, is important so that: a) treatment can be  
11 initiated quickly, b) contraindications to liver transplant can be identified, c) prognoses can be determined more  
12 accurately, and most important, d) vaccination against viral ALF aetiologies can be prioritized especially in under-  
13 resourced regions with public health risks associated with the relevant attributable diseases.  
14  
15  
16  
17  
18

19 To the best of our knowledge, no extensive systematic review of the global epidemiology of viral-induced ALF has  
20 previously been conducted. Furthermore, synthesized data on the relative contribution of different viruses to the  
21 aetiology of ALF is missing in the field. Hepatitis A, is a major cause of ALF and the epidemiology of the disease is  
22 changing on a global scale. For example, it has been reported in many low and middle-income countries, that the  
23 epidemiology hepatitis A is transitioning from high to intermediate endemicity and this transition is associated  
24 with an increasing incidence of acute hepatitis A (13-15). This review aims to describe the global epidemiology of  
25 viral-induced ALF.  
26  
27  
28  
29

### 30 31 **Objectives**

32 To describe the global epidemiology of viral-induced acute liver failure from 2005 up to 2019.

#### 33 *Primary objectives*

- 34 • To estimate the burden (prevalence, incidence, hospitalization rates including access to intensive/high  
35 care units, transplantation rates, case fatality rates) of viral-induced ALF

#### 36 *Secondary objectives*

- 37 • To estimate the number of viral-induced acute liver failure cases attributable to each viral aetiological  
38 cause of acute liver failure

### 39 40 **METHODS**

#### 41 **Patient and Public Involvement**

42 This research question was developed as part of an ongoing project by the research team that aims to generate  
43 evidence to facilitate evidence-based decision making of introducing routine hepatitis A vaccination in South  
44 Africa. The findings of this review will contribute to the knowledge base that aims to enhance global vaccination  
45 strategies against viral-associated ALF. As this is a systematic review, no patient involvement will be required;  
46 however, it is hoped that the findings of this review will help to highlight the burden that acute liver failure places  
47  
48  
49  
50  
51  
52  
53  
54  
55  
56

1  
2  
3 on populations without routine hepatitis A vaccination. Findings will be disseminated through publication in a peer  
4 reviewed journal and included in a technical policy dossier distributed to the National Advisory Group on  
5 Immunisation in South Africa.  
6  
7

### 8 9 ***Criteria for considering studies for this review***

#### 10 **Types of studies**

11  
12 Published and unpublished case-series, cross-sectional, cohort and randomized control trials (RCT) and non-  
13 randomized control trials (nRCT) will be eligible for inclusion in this review.  
14  
15

#### 16 **Types of participants**

17  
18 Patients of any age diagnosed with acute liver failure and concurrent infection with any of the following viruses:  
19 Hepatitis A virus (HAV), hepatitis B virus (HBV), hepatitis C virus (HCV), hepatitis D virus (HDV), hepatitis E virus  
20 (HEV), epstein-barr virus (EBV), herpes simplex virus-1 (HSV1), herpes simplex virus-2 (HSV2), varicella-zoster virus  
21 (VZV), parvo-virus B19, human parainfluenza viruses (HPIVs), yellow fever virus (YFV), human herpesvirus 6 (HVV-  
22 6), cytomegalovirus (CMV), coxsackievirus (CA16) and adenovirus (HAdVs).  
23  
24  
25  
26

#### 27 ***Case definition***

28  
29 Included studies must have a clearly stated case definition of viral-induced acute liver failure. Cases must be  
30 confirmed by both clinical and laboratory diagnostic methods.  
31

- 32 • Clinical diagnosis of ALF will be defined as follows for children and adults presenting with an acute liver  
33 injury:  
34
  - 35 ○ Children – The absence of known, chronic liver disease with liver-based coagulopathy not  
36 responsive to parenteral vitamin K and an international normalized ratio (INR)  $\geq 1.5$  in the  
37 presence of clinical evidence of encephalopathy or INR of  $\geq 2.0$  without clinical signs of  
38 encephalopathy (16)
  - 39 ○ Adults – Liver-based coagulopathy (INR  $\geq 1.5$ ) and any grade of hepatic encephalopathy (HE) as  
40 defined by the West Haven criteria within 26 weeks after the onset of symptoms but with no  
41 evidence of chronic liver disease, including cirrhosis (1, 17)
- 42 • Serological, molecular or culture laboratory confirmation of infection with HAV, HBV, HCV, HDV, HEV,  
43 EBV, HSV1, HSV2, VZV, parvo-virus B19, HPIVs, YFV, HVV-6, CMV, CA16 or HAdVs.  
44  
45  
46  
47  
48  
49

#### 50 ***Exclusion criteria***

51  
52 Studies will be excluded from this review if they do not report any of the primary outcomes listed or do not match  
53 the clearly stated case definition of viral-induced acute liver failure given for this review.  
54  
55  
56  
57

## Outcomes

### Primary outcomes

- Point prevalence of viral-induced ALF
- Incidence of viral-induced ALF
- Hospitalization rates of viral-induced ALF
- Case fatality rates of viral- induced ALF
- Liver transplant rates of viral- induced ALF

### Secondary outcomes

- Proportion of viral-induced ALF cases attributable to each aetiological cause of viral ALF

## Search Methods

The literature search strategy will use both text words and medical subject heading (MeSH) terms. It will include the following terms: epidemiology, prevalence, incidence, burden, mortality, morbidity, fulminant hepatic failure, fulminant liver failure, acute hepatic failure, acute liver failure, Hepatitis A virus (HAV), hepatitis B virus (HBV), hepatitis C virus (HCV), hepatitis D virus (HDV), hepatitis E virus (HEV), epstein-barr virus (EBV), herpes simplex virus-1 (HSV1), herpes simplex virus-2 (HSV2), varicella-zoster virus (VZV), parvo-virus B19, human parainfluenza viruses (HPIVs), yellow fever virus (YFV), human herpesvirus 6 (HHV-6), cytomegalovirus (CMV) and coxsackie virus. These terms will be adapted for use in each defined database and then will be combined with a relevant filter to select studies eligible for inclusion in the review. **Table 1** shows an example search strategy for use in PubMed.

The following electronic databases will be searched for relevant published literature: EBSCOhost, PubMed, ScienceDirect, Scopus, Web of Science, Ovid, CINAHL and EBM Reviews. Grey literature will be sourced by consulting with expert researchers in the field and by searching the following electronic databases: OpenUCT, OpenGrey, Mednar and CORE. Databases will be searched for literature from 2009 up to 2019. The starting date of 2005 was chosen as Bernal et al. 2010 completed searched Medline with the terms “acute liver failure” and “fulminant hepatic failure” between 1997 and 2009 and provided a review of the most relevant publications to practice. No language restriction will be places on the search for studies (8).

**Table 1: Search strategy for use in PUBMED**

| Query | Fields     | Search term                                                                 |
|-------|------------|-----------------------------------------------------------------------------|
| #1    | All fields | epidemiology OR prevalence OR incidence OR burden OR mortality OR morbidity |
| #2    | All fields | fulminant OR acute                                                          |
| #3    | All fields | hepatic failure OR liver failure                                            |



|    |            |                                                                                                                                                                                                                                                                                                                                                                                                                                                  |
|----|------------|--------------------------------------------------------------------------------------------------------------------------------------------------------------------------------------------------------------------------------------------------------------------------------------------------------------------------------------------------------------------------------------------------------------------------------------------------|
| #4 | All fields | hepatitis a virus OR HAV OR hepatitis b virus OR HBV OR hepatitis c virus OR HCV OR HCV OR hepatitis d virus OR HDV OR hepatitis e virus OR HEV OR epstein-barr virus OR EBV OR herpes simplex virus-1 OR HSV1 OR herpes simplex virus-2 OR HSV2 OR varicella-zoster virus OR VZV OR parvovirus b19 OR human parainfluenza viruses OR yellow fever virus OR YFV OR human herpesvirus 6 OR HHV-6 OR cytomegalovirus OR CMV OR adenovirus OR HAdVs |
| #5 | All fields | humans                                                                                                                                                                                                                                                                                                                                                                                                                                           |
| #6 | N/A        | #1 AND #2 AND #3 AND #4 AND #5                                                                                                                                                                                                                                                                                                                                                                                                                   |

### ***Selection of studies***

Two authors, JP and LA, will screen the search outputs by reading the titles and abstracts, guided by the inclusion and exclusion criteria. JP and LA will then independently screen the full-text articles for final inclusion using the software *Rayyan*. Inconsistencies in the list of eligible studies will be resolved through discussion and consensus with the last author (RM).

### ***Data extraction and dealing with missing data***

Two authors (JP and LA) will independently extract data from the included studies on a standardised, pre-designed extraction form. In the event of any disagreement between the two authors, a third author (RM) will be consulted. In the case where non-English studies are selected for inclusion in the review, GoogleTranslate will be used to allow for data extraction (18). In the event that data are missing, we will contact the investigators or study sponsors to obtain the missing data. In the event of no reply within one month, we will exclude the study from the outcome respective to the missing data.

The following information will be extracted from the included studies:

- Study characteristics: year of publication, study design, sample size and objectives of study
- Study population: country, WHO region, country income level, hepatitis A vaccination program (yes or no)
- Case definition: clinical case definition and laboratory confirmation methods and the type of virus or viruses indicated as the causative agent for the condition
- Case characteristics: age, gender, hepatitis A vaccination status, country of residence and immune suppressive conditions (e.g. HIV, cancer and diabetes, immunosuppression, chemotherapy)

### ***Data management***

Data management will be the responsibility of the first author (JP) in consultation with SS, BMK and RM. An electronic parent folder with the name of this study will be created. Subfolders will also be created to keep the details of different tasks completed such as all records retrieved, records included and excluded, risk of bias assessment results, analyses and full systematic review manuscript drafts. Two back-ups of the parent folder will be created and stored on a memory stick and a hard drive.

### ***Risk of bias assessment of included studies***

Two review authors will independently assess the risk of bias for each included study using the Cochrane domain-based evaluation for experimental studies and the 2012 Hoy *et al.*, tool for observational studies (19, 20). In case of disagreement, a third author will be consulted to resolve the inconsistencies. A version of Hoy *et al.*, tool is shown in Appendix 1. For included experimental study, we will report bias assessments in the form of a risk of bias graphs created in RevMan (21). For included observational studies, we report risk of bias together with a descriptive summary of the information that influenced our judgment in a risk of bias table. We will judge observational studies as having ‘low risk’, ‘unclear risk’ or ‘high risk’ of bias.

### ***Assessment of heterogeneity***

We will use forest plots to assess the presence of statistical heterogeneity. We will assess heterogeneity by calculating  $\text{Chi}^2$  (threshold  $P > 0.1$ ) and  $I^2$  statistics (threshold  $I^2 > 40\%$ ). The values of  $I^2$  will be categorized for heterogeneity as follow: “not important” (0 to 40%), “moderate” (41 to 60%) and “considerable” (61 to 80%) and “substantial” (81 to 100%). Where “not important” or “moderate” heterogeneity exists between studies ( $I^2 \leq 40\%$ ), the outcomes will be pooled in a meta-analysis and reported using forest plots. Where “considerable” or “substantial” heterogeneity exists between studies ( $I^2 > 40\%$ ), the outcomes will be reported in narrative form and displayed using forest plots.

### ***Assessment of reporting biases***

A funnel plot will be constructed to assess the risk of publication bias included in the meta-analysis with over 10 studies of varying sizes. The funnel plot will be examined for asymmetry visually and statistically using the Egger test (22).

### ***Data synthesis***

We will employ STATA software version 14 to analyse the dichotomous data from the included studies through meta-analysis. We will calculate proportions for each outcome with uncertainty in each result expressed using 95% confidence intervals (CI).

### ***Subgroup analysis***

Where sufficient data exists, subgroup analyses will be conducted according to the following groupings:

- Age-group
- HIV status (not exposed/not infected, exposed/not-infected, infected)
- Country
- WHO region
- Countries with and without routine hepatitis A vaccination programs

- Length of routine hepatitis A vaccination in a country

### ***Sensitivity analysis***

Inclusion/exclusion analyses will be performed in order to assess the potential impact of risk of bias on the robustness of outcome estimates. We will conduct analyses to provide three estimates of intervention effects in respect to bias; outcome estimates with inclusion of only trials at low risk of bias, outcome estimates with inclusion of only trials at high risk of bias and outcome estimates with inclusion of all trials.

### ***Reporting of the review***

The study will be presented according to the updated 2009 PRISMA guidelines for reporting systematic reviews. The study selection process will be summarised using a PRISMA flow diagram. Tables will be used to summarise both qualitative and quantitative data from individual studies included in the review. Quantitative data from the review will be presented using narrative descriptions, forest plots and graphs where relevant.

### ***Systematic Review Registration***

This protocol has been registered with the International Prospective Register of Systematic Reviews (PROSPERO), registration number (CRD42018110309).

### ***Author's contributions***

JP, GDH, BK and RM conceived this study. JP developed the study protocol with the help of BK and RM. JP will implement the review under the supervision of RM. JP and LA will perform the study search, screening, and extraction of data under the guidance of RM. SS, LG, WS, MS and GDH will provide content expertise in the review and all authors will provide comments on the final manuscript before publication.

## REFERENCES

1. Lee WM, Stravitz RT, Larson AM. Introduction to the revised American Association for the Study of Liver Diseases Position Paper on acute liver failure. *Hepatology*. 2012;55(3):965-7.
2. European Association for the Study of the Liver. Electronic address eee, Clinical practice guidelines p, Wendon J, Panel m, Cordoba J, Dhawan A, et al. EASL Clinical Practical Guidelines on the management of acute (fulminant) liver failure. *J Hepatol*. 2017;66(5):1047-81.
3. O'Grady J, Schalm S, Williams R. Acute liver failure: redefining the syndromes. *Lancet*. 1993;342(8866):273-5.
4. Morabito V, Adebayo D. Fulminant Hepatitis: Definitions, Causes and Management. *Health*. 2014;06(10):1038-48.
5. O'Grady JG. Acute liver failure. *Postgrad Med J*. 2005;81(953):148-54.
6. Research MFFMEa. Acute liver failure 2017 [updated 29 August 2017. Available from: <https://www.mayoclinic.org/diseases-conditions/acute-liver-failure/symptoms-causes/syc-20352863>.
7. Cervio G, Trentadue J, D'Agostino D, Luque C, Giorgi M, Armoni J, et al. Decline in HAV-associated fulminant hepatic failure and liver transplant in children in Argentina after the introduction of a universal hepatitis A vaccination program. *Hepat Med*. 2011;3:99-106.
8. Bernal W, Auzinger G, Dhawan A, Wendon J. Acute liver failure. *Lancet*. 2010;376(Seminar):190-201.
9. Wlodzimirow KA, Eslami S, Abu-Hanna A, Nieuwoudt M, Chamuleau RA. Systematic review: acute liver failure - one disease, more than 40 definitions. *Aliment Pharmacol Ther*. 2012;35(11):1245-56.
10. McPhail M, Wendon J, Bernal W. Meta-analysis of performance of King's College Hospital Criteria in prediction of outcome in nonparacetamol-induced acute liver failure. *J Hepatol*. 2010;53:492-9.
11. O'Grady J. Liver transplantation for acute liver failure. *Best Pract Res Clin Gastroenterol*. 2012;26(1):27-33.
12. Spearman CW, McCulloch M, Millar AJ, Burger H, Numanoglu A, Goddard E, et al. Liver transplantation at Red Cross War Memorial Children's Hospital. *South African medical journal = Suid-Afrikaanse tydskrif vir geneeskunde*. 2006;96(9 Pt 2):960-3.
13. Mazanderani AH, Motaze VN, McCarthy K, Suchard M, du Plessis NM. Hepatitis A Virus Seroprevalence in South Africa-Estimates using Routine Laboratory Data, 2005-2015. 2018.
14. Jacobsen KH, Koopman JS. The effects of socioeconomic development on worldwide hepatitis A virus seroprevalence patterns. *Int J Epidemiol*. 2005;34(3):600-9.
15. Nelson KE. Global changes in the epidemiology of hepatitis A virus infections. *Clinical Infectious Diseases*. 2006;42(Editorial commentary).
16. Smith SK, Rosenthal P. Pediatric liver failure: we came, we saw, but have we conquered? *F1000Res*. 2017;6:1540.
17. Ganger DR, Rule J, Rakela J, Bass N, Reuben A, Stravitz RT, et al. Acute Liver Failure of Indeterminate Etiology: A Comprehensive Systematic Approach by An Expert Committee to Establish Causality. *Am J Gastroenterol*. 2018.
18. Balk E, Ching M, Chen M, Trikalinos T, L KWC. Assessing the Accuracy of Google Translate to Allow Data Extraction From Trials Published in Non-English Languages. Rockville, USA: Agency for Healthcare Research and Quality; 2013 Jan 2013. Contract No.: EHC145-EF.
19. Hoy D, Brooks P, Woolf A, Blyth F, March L, Bain C. Assessing risk of bias in prevalence studies: Modification of an existing tool and evidence of interrater agreement. *Journal of Clinical Epidemiology*. 2012;65:934-9.
20. Werfalli M, Musekiwa A, Engel ME, Ross I, Kengne AP, Levitt NS. The prevalence of type 2 diabetes mellitus among older people in Africa: a systematic review study protocol. *BMJ Open*. 2014.
21. Review Manager. Copenhagen2014.
22. Egger M, Smith DG, Schneider M, Minder C. Bias in meta-analyses detected by a simple, graphical test. *BMJ*. 1997;315(7109):629-34.

**APPENDIX 1****Table 2: Risk of bias and quality assessment tool for prevalence studies**

| <b>External validity</b> |                                                                                                                        | <b>Score</b>    |
|--------------------------|------------------------------------------------------------------------------------------------------------------------|-----------------|
| 1.                       | Was the study's target population a close representation of the national population in relation to relevant variables? | 1 Point         |
| 2.                       | Was the sampling frame a true or close representation of the target population?                                        | 1 point         |
| 3.                       | Was some form of random selection used to select the sample, or was a census undertaken?                               | 1 point         |
| 4.                       | Was the likelihood of non-response bias minimal?                                                                       | 1 point         |
| <b>Total</b>             |                                                                                                                        | <b>4 points</b> |
| <b>Internal validity</b> |                                                                                                                        | <b>Score</b>    |
| 1.                       | Were data collected directly from the participants (as opposed to a proxy)?                                            | 1 point         |
| 2.                       | Was an acceptable case definition used in the study?                                                                   | 1 point         |
| 3.                       | Was the study instrument that measured the parameter of interest shown to have validity and reliability?               | 1 point         |
| 4.                       | Was the same mode of data collection used for all participants?                                                        | 1 point         |
| 5.                       | Was the length of the shortest prevalence period for the parameter of interest appropriate?                            | 1 point         |
| 6.                       | Were the numerator(s) and denominator(s) for the parameter of interest appropriate?                                    | 1 point         |
| <b>Total</b>             |                                                                                                                        | <b>6 points</b> |

## MOOSE (Meta-analyses Of Observational Studies in Epidemiology) Checklist

A reporting checklist for Authors, Editors, and Reviewers of Meta-analyses of Observational Studies. You must report the page number in your manuscript where you consider each of the items listed in this checklist. If you have not included this information, either revise your manuscript accordingly before submitting or note N/A.

| Reporting Criteria                                                                                              | Reported (Yes/No) | Reported on Page No. |
|-----------------------------------------------------------------------------------------------------------------|-------------------|----------------------|
| <b>Reporting of Background</b>                                                                                  |                   |                      |
| Problem definition                                                                                              |                   |                      |
| Hypothesis statement                                                                                            |                   |                      |
| Description of Study Outcome(s)                                                                                 |                   |                      |
| Type of exposure or intervention used                                                                           |                   |                      |
| Type of study design used                                                                                       |                   |                      |
| Study population                                                                                                |                   |                      |
| <b>Reporting of Search Strategy</b>                                                                             |                   |                      |
| Qualifications of searchers (eg, librarians and investigators)                                                  |                   |                      |
| Search strategy, including time period included in the synthesis and keywords                                   |                   |                      |
| Effort to include all available studies, including contact with authors                                         |                   |                      |
| Databases and registries searched                                                                               |                   |                      |
| Search software used, name and version, including special features used (eg, explosion)                         |                   |                      |
| Use of hand searching (eg, reference lists of obtained articles)                                                |                   |                      |
| List of citations located and those excluded, including justification                                           |                   |                      |
| Method for addressing articles published in languages other than English                                        |                   |                      |
| Method of handling abstracts and unpublished studies                                                            |                   |                      |
| Description of any contact with authors                                                                         |                   |                      |
| <b>Reporting of Methods</b>                                                                                     |                   |                      |
| Description of relevance or appropriateness of studies assembled for assessing the hypothesis to be tested      |                   |                      |
| Rationale for the selection and coding of data (eg, sound clinical principles or convenience)                   |                   |                      |
| Documentation of how data were classified and coded (eg, multiple raters, blinding, and interrater reliability) |                   |                      |
| Assessment of confounding (eg, comparability of cases and controls in studies where appropriate)                |                   |                      |

| Reporting Criteria                                                                                                                                                                                                                                                           | Reported (Yes/No) | Reported on Page No. |
|------------------------------------------------------------------------------------------------------------------------------------------------------------------------------------------------------------------------------------------------------------------------------|-------------------|----------------------|
| Assessment of study quality, including blinding of quality assessors; stratification or regression on possible predictors of study results                                                                                                                                   |                   |                      |
| Assessment of heterogeneity                                                                                                                                                                                                                                                  |                   |                      |
| Description of statistical methods (eg, complete description of fixed or random effects models, justification of whether the chosen models account for predictors of study results, dose-response models, or cumulative meta-analysis) in sufficient detail to be replicated |                   |                      |
| Provision of appropriate tables and graphics                                                                                                                                                                                                                                 |                   |                      |
| <b>Reporting of Results</b>                                                                                                                                                                                                                                                  |                   |                      |
| Table giving descriptive information for each study included                                                                                                                                                                                                                 |                   |                      |
| Results of sensitivity testing (eg, subgroup analysis)                                                                                                                                                                                                                       |                   |                      |
| Indication of statistical uncertainty of findings                                                                                                                                                                                                                            |                   |                      |
| <b>Reporting of Discussion</b>                                                                                                                                                                                                                                               |                   |                      |
| Quantitative assessment of bias (eg, publication bias)                                                                                                                                                                                                                       |                   |                      |
| Justification for exclusion (eg, exclusion of non-English-language citations)                                                                                                                                                                                                |                   |                      |
| Assessment of quality of included studies                                                                                                                                                                                                                                    |                   |                      |
| <b>Reporting of Conclusions</b>                                                                                                                                                                                                                                              |                   |                      |
| Consideration of alternative explanations for observed results                                                                                                                                                                                                               |                   |                      |
| Generalization of the conclusions (ie, appropriate for the data presented and within the domain of the literature review)                                                                                                                                                    |                   |                      |
| Guidelines for future research                                                                                                                                                                                                                                               |                   |                      |
| Disclosure of funding source                                                                                                                                                                                                                                                 |                   |                      |

Once you have completed this checklist, please save a copy and upload it as part of your submission. DO NOT include this checklist as part of the main manuscript document. It must be uploaded as a separate file.

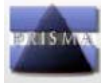

# PRISMA 2009 Checklist

| Section/topic                      | #  | Checklist item                                                                                                                                                                                                                                                                                              | Reported on page # |
|------------------------------------|----|-------------------------------------------------------------------------------------------------------------------------------------------------------------------------------------------------------------------------------------------------------------------------------------------------------------|--------------------|
| <b>TITLE</b>                       |    |                                                                                                                                                                                                                                                                                                             |                    |
| Title                              | 1  | Identify the report as a systematic review, meta-analysis, or both.                                                                                                                                                                                                                                         | 7                  |
| <b>ABSTRACT</b>                    |    |                                                                                                                                                                                                                                                                                                             |                    |
| Structured summary                 | 2  | Provide a structured summary including, as applicable: background; objectives; data sources; study eligibility criteria, participants, and interventions; study appraisal and synthesis methods; results; limitations; conclusions and implications of key findings; systematic review registration number. | 2                  |
| <b>INTRODUCTION</b>                |    |                                                                                                                                                                                                                                                                                                             |                    |
| Rationale                          | 3  | Describe the rationale for the review in the context of what is already known.                                                                                                                                                                                                                              | 4                  |
| Objectives                         | 4  | Provide an explicit statement of questions being addressed with reference to participants, interventions, comparisons, outcomes, and study design (PICOS).                                                                                                                                                  | 4                  |
| <b>METHODS</b>                     |    |                                                                                                                                                                                                                                                                                                             |                    |
| Protocol and registration          | 5  | Indicate if a review protocol exists, if and where it can be accessed (e.g., Web address), and, if available, provide registration information including registration number.                                                                                                                               | 9                  |
| Eligibility criteria               | 6  | Specify study characteristics (e.g., PICOS, length of follow-up) and report characteristics (e.g., years considered, language, publication status) used as criteria for eligibility, giving rationale.                                                                                                      | 4                  |
| Information sources                | 7  | Describe all information sources (e.g., databases with dates of coverage, contact with study authors to identify additional studies) in the search and date last searched.                                                                                                                                  | 6                  |
| Search                             | 8  | Present full electronic search strategy for at least one database, including any limits used, such that it could be repeated.                                                                                                                                                                               | 6                  |
| Study selection                    | 9  | State the process for selecting studies (i.e., screening, eligibility, included in systematic review, and, if applicable, included in the meta-analysis).                                                                                                                                                   | 6-7                |
| Data collection process            | 10 | Describe method of data extraction from reports (e.g., piloted forms, independently, in duplicate) and any processes for obtaining and confirming data from investigators.                                                                                                                                  | 7                  |
| Data items                         | 11 | List and define all variables for which data were sought (e.g., PICOS, funding sources) and any assumptions and simplifications made.                                                                                                                                                                       | 7                  |
| Risk of bias in individual studies | 12 | Describe methods used for assessing risk of bias of individual studies (including specification of whether this was done at the study or outcome level), and how this information is to be used in any data synthesis.                                                                                      | 7                  |
| Summary measures                   | 13 | State the principal summary measures (e.g., risk ratio, difference in means).                                                                                                                                                                                                                               | 8                  |
| Synthesis of results               | 14 | Describe the methods of handling data and combining results of studies, if done, including measures of consistency (e.g., $I^2$ ) for each meta-analysis.                                                                                                                                                   | 8                  |



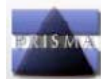

# PRISMA 2009 Checklist

1  
2  
3  
4  
5  
6  
7  
8  
9  
10  
11  
12  
13  
14  
15  
16  
17  
18  
19  
20  
21  
22  
23  
24  
25  
26  
27  
28  
29  
30  
31  
32  
33  
34  
35  
36  
37  
38  
39  
40  
41  
42  
43  
44  
45  
46  
47

| Section/topic                 | #  | Checklist item                                                                                                                                                                                           | Reported on page # |
|-------------------------------|----|----------------------------------------------------------------------------------------------------------------------------------------------------------------------------------------------------------|--------------------|
| Risk of bias across studies   | 15 | Specify any assessment of risk of bias that may affect the cumulative evidence (e.g., publication bias, selective reporting within studies).                                                             | 8                  |
| Additional analyses           | 16 | Describe methods of additional analyses (e.g., sensitivity or subgroup analyses, meta-regression), if done, indicating which were pre-specified.                                                         | 8                  |
| <b>RESULTS</b>                |    |                                                                                                                                                                                                          |                    |
| Study selection               | 17 | Give numbers of studies screened, assessed for eligibility, and included in the review, with reasons for exclusions at each stage, ideally with a flow diagram.                                          | N/A                |
| Study characteristics         | 18 | For each study, present characteristics for which data were extracted (e.g., study size, PICOS, follow-up period) and provide the citations.                                                             | N/A                |
| Risk of bias within studies   | 19 | Present data on risk of bias of each study and, if available, any outcome level assessment (see item 12).                                                                                                | N/A                |
| Results of individual studies | 20 | For all outcomes considered (benefits or harms), present, for each study: (a) simple summary data for each intervention group (b) effect estimates and confidence intervals, ideally with a forest plot. | N/A                |
| Synthesis of results          | 21 | Present results of each meta-analysis done, including confidence intervals and measures of consistency.                                                                                                  | N/A                |
| Risk of bias across studies   | 22 | Present results of any assessment of risk of bias across studies (see Item 15).                                                                                                                          | N/A                |
| Additional analysis           | 23 | Give results of additional analyses, if done (e.g., sensitivity or subgroup analyses, meta-regression [see Item 16]).                                                                                    | N/A                |
| <b>DISCUSSION</b>             |    |                                                                                                                                                                                                          |                    |
| Summary of evidence           | 24 | Summarize the main findings including the strength of evidence for each main outcome; consider their relevance to key groups (e.g., healthcare providers, users, and policy makers).                     | N/A                |
| Limitations                   | 25 | Discuss limitations at study and outcome level (e.g., risk of bias), and at review-level (e.g., incomplete retrieval of identified research, reporting bias).                                            | 2                  |
| Conclusions                   | 26 | Provide a general interpretation of the results in the context of other evidence, and implications for future research.                                                                                  | N/A                |
| <b>FUNDING</b>                |    |                                                                                                                                                                                                          |                    |
| Funding                       | 27 | Describe sources of funding for the systematic review and other support (e.g., supply of data); role of funders for the systematic review.                                                               | N/A                |

From: Moher D, Liberati A, Tetzlaff J, Altman DG, The PRISMA Group (2009). Preferred Reporting Items for Systematic Reviews and Meta-Analyses: The PRISMA Statement. PLoS Med 6(7): e1000097. doi:10.1371/journal.pmed1000097

For more information, visit: [www.prisma-statement.org](http://www.prisma-statement.org).

# BMJ Open

## The Global Epidemiology of Viral-Induced Acute Liver Failure: A Systematic Review Protocol

|                                 |                                                                                                                                                                                                                                                                                                                                                                                                                                                                                                                                                                                                                                                                                                                                                                                                                                                                                                                                                                                                                                                                                                                                                                                                                                                                                                                                                                                                                |
|---------------------------------|----------------------------------------------------------------------------------------------------------------------------------------------------------------------------------------------------------------------------------------------------------------------------------------------------------------------------------------------------------------------------------------------------------------------------------------------------------------------------------------------------------------------------------------------------------------------------------------------------------------------------------------------------------------------------------------------------------------------------------------------------------------------------------------------------------------------------------------------------------------------------------------------------------------------------------------------------------------------------------------------------------------------------------------------------------------------------------------------------------------------------------------------------------------------------------------------------------------------------------------------------------------------------------------------------------------------------------------------------------------------------------------------------------------|
| Journal:                        | <i>BMJ Open</i>                                                                                                                                                                                                                                                                                                                                                                                                                                                                                                                                                                                                                                                                                                                                                                                                                                                                                                                                                                                                                                                                                                                                                                                                                                                                                                                                                                                                |
| Manuscript ID                   | bmjopen-2019-029819.R1                                                                                                                                                                                                                                                                                                                                                                                                                                                                                                                                                                                                                                                                                                                                                                                                                                                                                                                                                                                                                                                                                                                                                                                                                                                                                                                                                                                         |
| Article Type:                   | Protocol                                                                                                                                                                                                                                                                                                                                                                                                                                                                                                                                                                                                                                                                                                                                                                                                                                                                                                                                                                                                                                                                                                                                                                                                                                                                                                                                                                                                       |
| Date Submitted by the Author:   | 20-May-2019                                                                                                                                                                                                                                                                                                                                                                                                                                                                                                                                                                                                                                                                                                                                                                                                                                                                                                                                                                                                                                                                                                                                                                                                                                                                                                                                                                                                    |
| Complete List of Authors:       | Patterson, Jenna; University of Cape Town, School of Public Health & Family Medicine, Vaccines for Africa Initiative<br>Hussey, Hannah; University of Cape Town, School of Public Health & Family Medicine, Vaccines for Africa Initiative<br>Abdullahi, Leila; Save the Children International, Research, Evaluation, Analysis, Learning and Monitoring (REALM)<br>Sikal, Sheetal; University of Cape Town, Department of Statistical Sciences; University of Oxford, Nuffield Department of Medicine<br>Goddard, Liz; University of Cape Town, Department of Paediatrics, Red Cross War Memorial Children's Hospital<br>Setshedi, Mashiko; University of Cape Town, Department of Medicine, Division of Gastroenterology, Grootte Schuur Hospital<br>Spearman, Wendy ; University of Cape Town, Department of Medicine, Division of Hepatology, Grootte Schuur Hospital<br>Hussey, Gregory; University of Cape Town, School of Public Health & Family Medicine, Vaccines For Africa Initiative; University of Cape Town, Institute of Infectious Disease and Molecular Medicine<br>Kagina, Benjamin; University of Cape Town, School of Public Health & Family Medicine, Vaccines for Africa Initiative<br>Muloiwa, Rudzani; University of Cape Town, School of Public Health & Family Medicine, Vaccines for Africa Initiative; University of Cape Town, Department of Paediatrics, Grootte Schuur Hospital |
| <b>Primary Subject Heading</b>: | Epidemiology                                                                                                                                                                                                                                                                                                                                                                                                                                                                                                                                                                                                                                                                                                                                                                                                                                                                                                                                                                                                                                                                                                                                                                                                                                                                                                                                                                                                   |
| Secondary Subject Heading:      | Gastroenterology and hepatology, Infectious diseases                                                                                                                                                                                                                                                                                                                                                                                                                                                                                                                                                                                                                                                                                                                                                                                                                                                                                                                                                                                                                                                                                                                                                                                                                                                                                                                                                           |
| Keywords:                       | Epidemiology < INFECTIOUS DISEASES, acute liver failure, VIROLOGY                                                                                                                                                                                                                                                                                                                                                                                                                                                                                                                                                                                                                                                                                                                                                                                                                                                                                                                                                                                                                                                                                                                                                                                                                                                                                                                                              |
|                                 |                                                                                                                                                                                                                                                                                                                                                                                                                                                                                                                                                                                                                                                                                                                                                                                                                                                                                                                                                                                                                                                                                                                                                                                                                                                                                                                                                                                                                |

SCHOLARONE™  
Manuscripts

# PROTOCOL

## The Global Epidemiology of Viral-Induced Acute Liver Failure: A Systematic Review Protocol

Jenna Patterson<sup>1,2</sup>, Hannah Hussey<sup>1,2</sup>, Leila Abdullahi<sup>2,4</sup>, Sheetal Silal<sup>5</sup>, Liz Goddard<sup>6</sup>, Mashiko Setshedi<sup>7</sup>, Wendy Spearman<sup>7</sup>, Gregory D. Hussey<sup>1,8</sup>, Benjamin M. Kagina<sup>1,2</sup> and Rudzani Muloiwa<sup>1,6</sup>

<sup>1</sup>Vaccines for Africa Initiative, University of Cape Town, South Africa

<sup>2</sup>School of Public Health & Family Medicine, University of Cape Town, South Africa

<sup>3</sup>Department of Medicine, Groote Schuur Hospital, University of Cape Town, South Africa

<sup>4</sup>Save the Children International, Somalia/Somaliland Country Office, Nairobi, Kenya

<sup>5</sup>Modelling and Simulation Hub, Africa, Department of Statistical Sciences, Faculty of Science, University of Cape Town, South Africa

<sup>6</sup>Department of Paediatrics & Child Health, Red Cross War Memorial Children's Hospital, University of Cape Town

<sup>7</sup>Department of Medicine, Groote Schuur Hospital, University of Cape Town, South Africa

<sup>8</sup>Institute of Infectious Disease and Molecular Medicine, University of Cape Town, South Africa

*Corresponding author:* Jenna Patterson

*Corresponding author's email address:* pttjen005@myuct.ac.za

*Corresponding author's postal address:* Vaccines for Africa Initiative, Room N2.09A, Werner Beit North, Health Sciences Campus, Anzio Road, Observatory, 7925

Patterson, J et al.

For peer review only - <http://bmjopen.bmj.com/site/about/guidelines.xhtml>

## **ABSTRACT**

**Introduction:** The burden of viral-induced ALF around the world still remains unclear, with little to no data collected regarding the disease incidence in general and synthesised data on the relative contribution of different viruses to the aetiology of ALF is missing in the field. The aim of this review is to estimate the burden (prevalence, incidence, mortality, hospitalization) of ALF following infection *HAV, HBV, HCV, HDV, HEV, EBV, HSV1, HSV2, VZV, parvo-virus B19, HPIVs, YFV, HHV-6, CMV, CA16 and/or HAdVs*. Establishing the common aetiologies of viral-induced acute liver failure, which vary geographically, is important so that: a) treatment can be initiated quickly, b) contraindications to liver transplant can be identified, c) prognoses can be determined more accurately, and most importantly, d) vaccination against viral ALF aetiologies can be prioritised especially in under-resourced regions with public health risks associated with the relevant attributable diseases.

**Methods and analysis:** EBSCOhost, PubMed, ScienceDirect, Scopus and Web of Science databases will be searched for relevant literature published and grey literature from 2009 up to 2019. Published cross-sectional and cohort studies will be eligible for inclusion in this review. Qualifying studies will be formally assessed for quality and risk of bias using a standardised scoring tool. Following standardised data extraction, meta-analyses will be carried out using STATA. Depending on characteristics of included studies, subgroup analyses and meta-regression analyses will be performed. This review will be reported according to Preferred Reporting Items for Systematic reviews and Meta-Analyses (PRISMA) guidelines.

**Ethics and dissemination:** No ethics approval is required as the systematic review will use only published data already in the public domain. Findings will be disseminated through publication in a peer reviewed journal.

**Registration:** This protocol has been registered with the International Prospective Register of Systematic Reviews (PROSPERO), registration number CRD42018110309.

**Key words:** global, epidemiology, acute liver failure

### **Strengths and limitations of study:**

- Comprehensive and exhaustive search for relevant studies from several databases
- Comprehensive diagnostic inclusion criteria for acute liver failure cases according to international guidelines
- Paucity of data may lead to meta-analysis and/or meta-regression analysis not being possible for all global regions
- Diversity of viruses attributable to ALF cases may lead to low statistical power in meta-analysis

**MAIN TEXT****INTRODUCTION**

Acute liver failure (ALF) refers to a rare syndrome characterised by an acute liver injury resulting in encephalopathy (altered mentation) and coagulopathy (International Normalised Ratio (INR) >1.5 ) in individuals without known pre-existing liver disease and with an illness of <26 weeks duration (1). The syndrome was originally defined as fulminant liver failure or fulminant hepatic failure in 1970 but was re-defined as ALF in the early 1990s when the understanding of the multiple disease aetiologies, frequency of complications and prognosis of the condition further developed (2). Further sub-classifications of ALF include hyperacute, acute and subacute depending on the time in weeks from the development of jaundice to the development of hepatic encephalopathy (3).

The pathogenesis of ALF includes both direct and immune-mediated liver injury triggered by the disease aetiology (4). The aetiology of ALF determines the clinical course and progression of the disease and well as the need for specific therapy (5). Possible causes of ALF include viral infections, drugs and toxins, pregnancy related liver diseases (acute fatty liver of pregnancy, HELLP syndrome, preeclampsia), vascular causes (Budd-Chiari syndrome, ischaemic hepatitis) and malignancy (lymphoma, haemophagocytic lymphohistiocytosis). Wilsons disease, vertically-acquired hepatitis B and autoimmune hepatitis are included despite being chronic liver diseases if the diagnosis is made within 26 weeks (6).

Acute viral hepatitis (particularly acute hepatitis A and acute E) has been identified as the most common cause of ALF among all ages in Asia and Africa and the most common causes of ALF in children in Asia and South America (2, 4). The incidence of virally induced ALF has substantially declined in Europe, with only 19% of all ALF cases now related to viral infection (2). Vaccination has led to a significant drop in the incidence of acute hepatitis B induced ALF, with fewer than 4% of ALF cases now attributable to hepatitis B infection in Europe (2). Since the introduction of a universal one-dose hepatitis A vaccination program in Argentina, the number of acute hepatitis A induced ALF cases has decreased from 54.6% to 27.7% (7).

The most common causes of death in patients with ALF are cerebral oedema and multi-organ system failure (4). Mortality rates associated with ALF vary between 60% and 80%, depending on the disease aetiology as well as a patient's access to care (8, 9). Liver transplantation plays a central role in the management of ALF and remains the only definitive treatment for patients who fail to demonstrate spontaneous recovery (1). It remains difficult to predict which patients with ALF will require transplantation and models such as the "Model for End-stage Liver Disease" (MELD) have not improved the accuracy of these predictions (1). The King's College Criteria for emergency liver transplantation remains the most clinically useful, with a sensitivity of 68%-69% and a specificity of 82%-92% (10). Management of ALF cases accounts for 5-12% of all liver transplant activity in the United States and Europe (11). A large proportion of patients with ALF in both high and low resource settings, however, are

1  
2  
3 103 deemed to have contraindications to transplantation or deteriorate beyond transplantation before a donor liver is  
4 104 allocated (5, 11, 12).

6  
7 105 The burden of viral-induced ALF around the world still remains unclear, with little to no data collected regarding  
8 106 the disease incidence in general (2). Epidemiological estimates around ALF are based purely on data from  
9 107 transplant units and the medical management of the condition remains poorly defined (1, 2). Establishing the  
10 108 common aetiologies of viral-induced ALF, which vary geographically, is important so that: a) treatment can be  
11 109 initiated quickly, b) contraindications to liver transplant can be identified, c) prognoses can be determined more  
12 110 accurately, and most important, d) vaccination against viral ALF aetiologies can be prioritised especially in under-  
13 111 resourced regions with public health risks associated with the relevant attributable diseases.

14 112  
15 113 To the best of our knowledge, no extensive systematic review of the global epidemiology of viral-induced ALF has  
16 114 previously been conducted. Furthermore, synthesised data on the relative contribution of different viruses to the  
17 115 aetiology of ALF is missing in the field. Hepatitis A is a major cause of ALF and the epidemiology of the disease is  
18 116 changing on a global scale. For example, it has been reported in many low and middle-income countries, that the  
19 117 epidemiology hepatitis A is transitioning from high to intermediate endemicity and this transition is associated  
20 118 with an increasing incidence of acute hepatitis A (13-15). This review aims to describe the global epidemiology of  
21 119 viral-induced ALF.

## 22 120 23 121 **Aim**

24 122 To estimate the burden (prevalence, incidence, mortality, hospitalization) of ALF following infection *HAV, HBV,*  
25 123 *HCV, HDV, HEV, EBV), HSV1, HSV2, VZV, parvo-virus B19, HPIVs, YFV, HHV-6, CMV, CA16 and/or HAdVs.*

## 26 124 27 125 **METHODS**

### 28 126 **Patient and Public Involvement**

29 127 This research question was developed as part of an ongoing project by the research team that aims to generate  
30 128 evidence to facilitate evidence-based decision making of introducing routine hepatitis A vaccination in South  
31 129 Africa. The findings of this review will contribute to the knowledge base that aims to enhance global vaccination  
32 130 strategies against viral-associated ALF. As this is a systematic review, no patient involvement will be required;  
33 131 however, it is hoped that the findings of this review will help to highlight the burden that acute liver failure places  
34 132 on populations without routine hepatitis A vaccination. Findings will be disseminated through publication in a peer  
35 133 reviewed journal and included in a technical policy dossier distributed to the National Advisory Group on  
36 134 Immunisation in South Africa.

37 135

38 136

1  
2  
3 137 **Criteria for considering studies for this review**

4 138 **Types of studies**

5  
6 139 Only published cross-sectional, surveillance and cohort studies will be eligible for inclusion in this review.

7  
8 140

9 141 **Types of participants**

10 142 Patients of any age with any of the following viral infections: hepatitis A virus (HAV), hepatitis B virus (HBV),  
11 143 hepatitis C virus (HCV), hepatitis D virus (HDV), hepatitis E virus (HEV), epstein-barr virus (EBV), herpes simplex  
12 144 virus-1 (HSV1), herpes simplex virus-2 (HSV2), varicella-zoster virus (VZV), parvo-virus B19, human parainfluenza  
13  
14 145 viruses (HPIVs), yellow fever virus (YFV), human herpesvirus 6 (HVV-6), cytomegalovirus (CMV), coxsackievirus  
15 146 (CA16) and adenovirus (HAdVs).

16  
17 147

18  
19  
20 148 **Case definition**

21 149 Included studies must have a clearly stated case definition of viral-induced acute liver failure. Cases must be  
22  
23 150 confirmed by both clinical and laboratory diagnostic methods.

24 151

- Clinical diagnosis of ALF will be defined as follows for children and adults presenting with an acute liver  
25  
26 152 injury:

27 153

- Children – The absence of known, chronic liver disease with liver-based coagulopathy not  
28  
29 154 responsive to parenteral vitamin K and an international normalised ratio (INR)  $\geq 1.5$  in the  
30  
31 155 presence of clinical evidence of encephalopathy or INR of  $\geq 2.0$  without clinical signs of  
32 156 encephalopathy (16)

33 157

- Adults – Liver-based coagulopathy (INR  $\geq 1.5$ ) and any grade of hepatic encephalopathy (HE) as  
34  
35 158 defined by the West Haven criteria within 26 weeks after the onset of symptoms but with no  
36  
37 159 evidence of chronic liver disease, including cirrhosis (1, 17)

38 160

- Serological, molecular or culture laboratory confirmation of infection with HAV, HBV, HCV, HDV, HEV,  
39  
40 161 EBV), HSV1, HSV2, VZV, parvo-virus B19, HPIVs, YFV, HVV-6, CMV, CA16 or HAdVs.

41 162

42 163 **Exclusion criteria**

43  
44 164 Studies will be excluded from this review if they do not report any of the primary outcomes listed or do not match  
45 165 the clearly stated case definition of viral-induced acute liver failure given for this review.

46  
47 166

48 167

49  
50 168

51 169

52  
53 170

54  
55 171

172

173 **Outcomes**

174 For ALF following infection with HAV, HBV, HCV, HDV, HEV, EBV), HSV1, HSV2, VZV, parvo-virus B19, HPIVs, YFV,  
 175 HHV-6, CMV, CA16 and/or HAdVs:

- 176 • Prevalence and incidence of ALF
- 177 • Mortality rate following ALF
- 178 • Prevalence and incidence of requirement for liver transplant
- 179 • Mean hospital stay for patients with ALF

180

181 **Search Methods**

182 The literature search strategy will use both text words and medical subject heading (MeSH) terms (all fields). It will  
 183 include the following terms: epidemiology, prevalence, incidence, burden, mortality, morbidity, fulminant hepatic  
 184 failure, fulminant liver failure, acute hepatic failure, acute liver failure, Hepatitis A virus (HAV), hepatitis B virus  
 185 (HBV), hepatitis C virus (HCV), hepatitis D virus (HDV), hepatitis E virus (HEV), epstein-barr virus (EBV), herpes  
 186 simplex virus-1 (HSV1), herpes simplex virus-2 (HSV2), varicella-zoster virus (VZV), parvo-virus B19, human  
 187 parainfluenza viruses (HPIVs), yellow fever virus (YFV), human herpesvirus 6 (HHV-6), cytomegalovirus (CMV) and  
 188 coxsackie virus. These terms will be adapted for use in each defined database and combined with relevant filters  
 189 for time period of studies eligible for inclusion in the review. **Table 1** shows an example search strategy for use in  
 190 PubMed. Each adapted search strategy for use in the outlined databases will be piloted by JP and HH to ensure the  
 191 outputs retrieved are relevant to the review objectives.

192

193 The following electronic databases will be searched from 2009 up to 2019 for relevant published literature:  
 194 EBSCOhost, PubMed, ScienceDirect, Scopus and Web of Science. The starting date of 2009 was chosen as *Bernal et*  
 195 *al. 2010* completed searched Medline with the terms “acute liver failure” and “fulminant hepatic failure” between  
 196 1997 and 2009, which provided a review of the most relevant publications to practice. No language restriction will  
 197 be places on the search for studies (8).

198

| Table 1: Search strategy for use in PUBMED |            |                                                                                                                                                                                                                                                                                                                                                                                                                                                  |
|--------------------------------------------|------------|--------------------------------------------------------------------------------------------------------------------------------------------------------------------------------------------------------------------------------------------------------------------------------------------------------------------------------------------------------------------------------------------------------------------------------------------------|
| Query                                      | Fields     | Search term                                                                                                                                                                                                                                                                                                                                                                                                                                      |
| #1                                         | All fields | epidemiology OR prevalence OR incidence OR burden OR mortality OR morbidity                                                                                                                                                                                                                                                                                                                                                                      |
| #2                                         | All fields | fulminant OR acute                                                                                                                                                                                                                                                                                                                                                                                                                               |
| #3                                         | All fields | hepatic failure OR liver failure                                                                                                                                                                                                                                                                                                                                                                                                                 |
| #4                                         | All fields | hepatitis a virus OR HAV OR hepatitis b virus OR HBV OR hepatitis c virus OR HCV OR HCV OR hepatitis d virus OR HDV OR hepatitis e virus OR HEV OR epstein-barr virus OR EBV OR herpes simplex virus-1 OR HSV1 OR herpes simplex virus-2 OR HSV2 OR varicella-zoster virus OR VZV OR parvovirus b19 OR human parainfluenza viruses OR yellow fever virus OR YFV OR human herpesvirus 6 OR HHV-6 OR cytomegalovirus OR CMV OR adenovirus OR HAdVs |



|    |            |                                |
|----|------------|--------------------------------|
| #5 | All fields | humans                         |
| #6 | N/A        | #1 AND #2 AND #3 AND #4 AND #5 |

### 199 **Selection of studies**

200 All electronic database outputs will be imported to Rayyan Software for screening and selection. The first and  
 201 second author will independently screen 100% titles and abstracts for inclusion of potentially eligible trials sourced  
 202 database searches. Titles and abstracts in non-English languages will be translated into English using Google  
 203 Translate. HH will collect full-text trials reports/publications of potentially eligible studies and then HH and JP will  
 204 independently screen 100% of full-text articles for inclusion. Where disagreement may occur between the two  
 205 authors, the last author (RM) will be consulted. We will record the selection process with reasons for exclusion  
 206 using a PRISMA flow diagram.

### 208 **Data extraction and dealing with missing data**

209 Two authors (JP and HH) will independently extract data from the included studies on a standardised, pre-designed  
 210 extraction form. In the event of any disagreement between the two authors, a third author (RM) will be consulted.  
 211 In the case where non-English studies are selected for inclusion in the review, GoogleTranslate will be used to  
 212 allow for data extraction (18). In the event that data are missing, we will contact the investigators or study  
 213 sponsors to obtain the missing data. In the event of no reply within one month, we will exclude the study from the  
 214 outcome respective to the missing data. Studies awaiting missing data requests will be marked as “awaiting  
 215 classification” in the table of included studies.

217 The following information will be extracted from the included studies:

- 218 • Study characteristics: year of publication, study design, sample size and objectives of study
- 219 • Study population: country, WHO region, country income level, hepatitis A vaccination program (yes or no)
- 220 • Case definition: clinical case definition and laboratory confirmation methods and the type of virus or viruses  
 221 indicated as the causative agent for the condition
- 222 • Case characteristics: age, gender, hepatitis A vaccination status, country of residence and immune suppressive  
 223 conditions (e.g. HIV, cancer and diabetes, immunosuppression, chemotherapy)

### 225 **Data management**

226 Data management will be the responsibility of the first author (JP) in consultation with SS, BMK and RM. An  
 227 electronic parent folder with the name of this study will be created. Subfolders will also be created to keep the  
 228 details of different tasks completed such as all records retrieved, records included and excluded, risk of bias  
 229 assessment results, analyses and full systematic review manuscript drafts. Two back-ups of the parent folder will  
 230 be created and stored on a memory stick and a hard drive.

231

1  
2  
3 232

4 233

5 234 **Risk of bias assessment of included studies**

6 235 Two review authors will independently assess the risk of bias for each included study using the Cochrane domain-  
7 236 based evaluation for experimental studies and the 2012 Hoy *et al.*, tool for observational studies (19, 20). In case  
8 237 of disagreement, a third author will be consulted to resolve the inconsistencies. A version of *Hoy et al.*, tool is  
9 238 shown in **Appendix 1**. For included experimental study, we will report bias assessments in the form of a risk of bias  
10 239 graphs created in RevMan (21). For included observational studies, we report risk of bias together with a  
11 240 descriptive summary of the information that influenced our judgment in a risk of bias table. We will judge  
12 241 observational studies as having 'low risk', 'unclear risk' or 'high risk' of bias.

13 242

14 243 **Assessment of heterogeneity**

15 244 We will use forest plots to assess the presence of statistical heterogeneity. We will assess heterogeneity by  
16 245 calculating  $\text{Chi}^2$  (threshold  $P > 0.1$ ) and  $I^2$  statistics (threshold  $I^2 > 40\%$ ). The values of  $I^2$  will be categorised for  
17 246 heterogeneity as follow: "not important" (0 to 40%), "moderate" (41 to 60%) and "considerable" (61 to 80%) and  
18 247 "substantial" (81 to 100%). Where "not important" or "moderate" heterogeneity exists between studies ( $I^2 \leq$   
19 248 40%), the outcomes will be pooled in a meta-analysis and reported using forest plots. Where "considerable" or  
20 249 "substantial" heterogeneity exists between studies ( $I^2 > 40\%$ ), the outcomes will be reported in narrative form and  
21 250 displayed using forest plots.

22 251

23 252 **Assessment of reporting biases**

24 253 A funnel plot will be constructed to assess the risk of publication bias included in the meta-analysis with over 10  
25 254 studies of varying sizes. The funnel plot will be examined for asymmetry visually and statistically using the Egger  
26 255 test (22).

27 256

28 257 **Data synthesis**

29 258 Proportions as percentages will be used to represent measures of frequency prioritised by the primary and  
30 259 secondary outcomes of the review. Included studies for each analysis will be assessed for heterogeneity using the  
31 260  $I^2$  statistic. Where sufficient homogeneity exists ( $I^2 < 50\%$ ) between studies, data will be pooled in a meta-  
32 261 analysis using Mantel-Haenszel random effects model and an inverse-variance model. Pooled frequency outcome  
33 262 estimates will be presented using forest plots after Freeman-Tukey transformation while comparative effect forest  
34 263 plots will be presented as risk ratios (RR). Both outcome measures will be reported with uncertainty expressed  
35 264 using 95% confidence intervals (CI). Where data are too heterogeneous ( $I^2 \geq 50\%$ ), outcome estimates will be  
36 265 reported narratively. STATA software V.14 (STATA Corporation, College Stations, Texas, USA) will be used to  
37 266 compute all statistical analyses in this review.

267

268

**269 Subgroup analysis**

270 Where sufficient data exists, subgroup analyses will be conducted according to the groupings below. Meta-  
271 regression analyses will be conducted for all sub-groups where there are  $\geq 10$  studies for inclusion in the analysis.

- 272 • Study design
- 273 • Age-groups (1 to 5 years old, 6 to 10 years old, 11 to 15 years old, 16 to 20 years old, 21 to 30 years old,  
274 31 to 40 years old, 41 to 50 years old, 51 to 60 years old,  $> 60$  years old)
  - 275 o These age groups have been used as individuals  $> 60$  years old are considered “elderly” in the  
276 acute liver failure literature reviewed
- 277 • HIV status (not exposed/not infected, exposed/not-infected, infected)
- 278 • Country
- 279 • WHO region
- 280 • Countries with and without routine hepatitis A vaccination programs
- 281 • Length of routine hepatitis A vaccination in a country

282

**283 Sensitivity analysis**

284 Inclusion/exclusion analyses will be performed in order to assess the potential impact of risk of bias on the  
285 robustness of outcome estimates. We will conduct analyses to provide three estimates of intervention effects in  
286 respect to bias; outcome estimates with inclusion of only studies at low risk of bias, outcome estimates with  
287 inclusion of only studies at high risk of bias and outcome estimates with inclusion of all studies. Where  
288 inconsistencies exist between outcome estimates with inclusion of only studies at low risk of bias and the outcome  
289 estimates of only studies at high risk or all included studies, these inconsistencies will be reported. Further,  
290 outcome estimates of studies at low and high risk will be interpreted separately in the review.

291

**292 Reporting of the review**

293 This review will be reported according to Preferred Reporting Items for Systematic reviews and Meta-Analyses  
294 (PRISMA) guidelines (**Appendix 2**). The study selection process will be summarised using a PRISMA flow diagram.  
295 Tables will be used to summarise both qualitative and quantitative data from individual studies included in the  
296 review. Quantitative data from the review will be presented using narrative descriptions, forest plots and graphs  
297 where relevant.

298

**299 Systematic Review Registration**

300 This protocol has been registered with the International Prospective Register of Systematic Reviews (PROSPERO),  
301 registration number (CRD42018110309).

1  
2  
3 3024  
5 3036 304 **Ethics and dissemination**7  
8 305 No ethics approval is required as the systematic review will use only published data already in the public domain.

9 306 Findings will be disseminated through publication in a peer reviewed journal.

10  
11 30712  
13 308 **Author's contributions**

14 309 JP, GDH, BMK and RM conceived this study. JP developed the study protocol with the help of BMK and RM. JP will

15  
16 310 implement the review under the supervision of RM. JP and HH will perform the study search, screening, and

17 311 extraction of data under the guidance of RM. LA and BMK will provide methodological expertise for this review. SS,

18 312 LG, WS, MS and GDH will provide content expertise for this review and all authors will provide comments on the

19 313 final manuscript before publication. JP will be the guarantor of this review.

20  
21 31422  
23 315 **Funding**

24 316 This research received no specific grant from any funding agency in the public, commercial or not-for-profit

25  
26 317 sectors. The Vaccines for Africa Initiative (VACFA) has funded the costs associated with the research and

27 318 dissemination of the results, including publications.

28  
29 31930  
31 320 **Competing interests**

32 321 None declared.

33  
34 32235  
36 323  
37  
38  
39  
40  
41  
42  
43  
44  
45  
46  
47  
48  
49  
50  
51  
52  
53  
54  
55  
56  
57  
58  
59  
60

1  
2  
3 324  
4  
5 325  
6 326  
7 327  
8 328  
9 329  
10 330  
11 331  
12 332  
13 333  
14 334  
15 335  
16 336  
17 337  
18 338  
19 339  
20 340  
21 341  
22 342  
23 343  
24 344  
25 345  
26 346  
27 347  
28 348  
29 349  
30 350  
31 351  
32 352  
33 353  
34 354  
35 355  
36 356  
37 357  
38 358  
39 359  
40 360  
41 361  
42 362  
43 363  
44 364  
45 365  
46 366

## REFERENCES

1. Lee WM, Stravitz RT, Larson AM. Introduction to the revised American Association for the Study of Liver Diseases Position Paper on acute liver failure 2011. *Hepatology*. 2012;55(3):965-7.
2. European Association for the Study of the Liver. Electronic address eee, Clinical practice guidelines p, Wendon J, Panel m, Cordoba J, Dhawan A, et al. EASL Clinical Practical Guidelines on the management of acute (fulminant) liver failure. *J Hepatol*. 2017;66(5):1047-81.
3. O'Grady J, Schalm S, Williams R. Acute liver failure: redefining the syndromes. *Lancet*. 1993;342(8866):273-5.
4. Morabito V, Adebayo D. Fulminant Hepatitis: Definitions, Causes and Management. *Health*. 2014;06(10):1038-48.
5. O'Grady JG. Acute liver failure. *Postgrad Med J*. 2005;81(953):148-54.
6. Mayo Clinic. Acute liver failure 2017 [updated 29 August 2017. Available from: <https://www.mayoclinic.org/diseases-conditions/acute-liver-failure/symptoms-causes/syc-20352863>.
7. Cervio G, Trentadue J, D'Agostino D, Luque C, Giorgi M, Armoni J, et al. Decline in HAV-associated fulminant hepatic failure and liver transplant in children in Argentina after the introduction of a universal hepatitis A vaccination program. *Hepat Med*. 2011;3:99-106.
8. Bernal W, Auzinger G, Dhawan A, Wendon J. Acute liver failure. *Lancet*. 2010;376(Seminar):190-201.
9. Wlodzimirow KA, Eslami S, Abu-Hanna A, Nieuwoudt M, Chamuleau RA. Systematic review: acute liver failure - one disease, more than 40 definitions. *Aliment Pharmacol Ther*. 2012;35(11):1245-56.
10. McPhail M, Wendon J, Bernal W. Meta-analysis of performance of King's College Hospital Criteria in prediction of outcome in nonparacetamol-induced acute liver failure. *J Hepatol*. 2010;53:492-9.
11. O'Grady J. Liver transplantation for acute liver failure. *Best Pract Res Clin Gastroenterol*. 2012;26(1):27-33.
12. Spearman CW, McCulloch M, Millar AJ, Burger H, Numanoglu A, Goddard E, et al. Liver transplantation at Red Cross War Memorial Children's Hospital. *South African medical journal = Suid-Afrikaanse tydskrif vir geneeskunde*. 2006;96(9 Pt 2):960-3.
13. Mazanderani AH, Motaze VN, McCarthy K, Suchard M, du Plessis NM. Hepatitis A Virus Seroprevalence in South Africa-Estimates using Routine Laboratory Data, 2005-2015. 2018.
14. Jacobsen KH, Koopman JS. The effects of socioeconomic development on worldwide hepatitis A virus seroprevalence patterns. *Int J Epidemiol*. 2005;34(3):600-9.
15. Nelson KE. Global changes in the epidemiology of hepatitis A virus infections. *Clinical Infectious Diseases*. 2006;42(Editorial commentary).
16. Smith SK, Rosenthal P. Pediatric liver failure: we came, we saw, but have we conquered? *F1000Res*. 2017;6:1540.
17. Ganger DR, Rule J, Rakela J, Bass N, Reuben A, Stravitz RT, et al. Acute Liver Failure of Indeterminate Etiology: A Comprehensive Systematic Approach by An Expert Committee to Establish Causality. *Am J Gastroenterol*. 2018.
18. Balk E, Ching M, Chen M, Trikalinos T, L KWC. Assessing the Accuracy of Google Translate to Allow Data Extraction From Trials Published in Non-English Languages. Rockville, USA: Agency for Healthcare Research and Quality; 2013 Jan 2013. Contract No.: EHC145-EF.
19. Hoy D, Brooks P, Woolf A, Blyth F, March L, Bain C. Assessing risk of bias in prevalence studies: Modification of an existing tool and evidence of interrater agreement. *Journal of Clinical Epidemiology*. 2012;65:934-9.
20. Werfalli M, Musekiwa A, Engel ME, Ross I, Kengne AP, Levitt NS. The prevalence of type 2 diabetes mellitus among older people in Africa: a systematic review study protocol. *BMJ Open*. 2014.
21. Review Manager. Copenhagen2014.
22. Egger M, Smith DG, Schneider M, Minder C. Bias in meta-analyses detected by a simple, graphical test. *BMJ*. 1997;315(7109):629-34.

1  
2  
3 **Appendix 1**  
4

5 **Hoy et. al/ Risk of bias and quality assessment tool for prevalence studies**  
6

7  
8  
9  
10  
11  
12  
13  
14  
15  
16  
17  
18  
19  
20  
21  
22  
23  
24  
25  
26  
27  
28  
29  
30  
31  
32  
33  
34  
35  
36  
37  
38  
39  
40  
41  
42  
43  
44  
45  
46  
47  
48  
49  
50  
51  
52  
53  
54  
55  
56  
57  
58  
59  
60

| External validity                                                                                                         | Score               |
|---------------------------------------------------------------------------------------------------------------------------|---------------------|
| 1. Was the study's target population a close representation of the national population in relation to relevant variables? | 1 Point             |
| 2. Was the sampling frame a true or close representation of the target population?                                        | 1 point             |
| 3. Was some form of random selection used to select the sample, or was a census undertaken?                               | 1 point             |
| 4. Was the likelihood of non-response bias minimal?                                                                       | 1 point             |
| <b>Total</b>                                                                                                              | <b>___/4 points</b> |
| Internal validity                                                                                                         | Score               |
| 1. Were data collected directly from the participants (as opposed to a proxy)?                                            | 1 point             |
| 2. Was an acceptable case definition used in the study?                                                                   | 1 point             |
| 3. Was the study instrument that measured the parameter of interest shown to have validity and reliability?               | 1 point             |
| 4. Was the same mode of data collection used for all participants?                                                        | 1 point             |
| 5. Was the length of the shortest prevalence period for the parameter of interest appropriate?                            | 1 point             |
| 6. Were the numerator(s) and denominator(s) for the parameter of interest appropriate?                                    | 1 point             |
| <b>Total</b>                                                                                                              | <b>___/6 points</b> |

## Appendix 2

## PRISMA-P Checklist

| Section and topic                  | Item No | Checklist item                                                                                                                                                                                                                                   | (Page No.#) |
|------------------------------------|---------|--------------------------------------------------------------------------------------------------------------------------------------------------------------------------------------------------------------------------------------------------|-------------|
| <b>ADMINISTRATIVE INFORMATION</b>  |         |                                                                                                                                                                                                                                                  |             |
| Title:                             |         |                                                                                                                                                                                                                                                  |             |
| Identification                     | 1a      | Identify the report as a protocol of a systematic review                                                                                                                                                                                         | 1           |
| Update                             | 1b      | If the protocol is for an update of a previous systematic review, identify as such                                                                                                                                                               | N/A         |
| Registration                       | 2       | If registered, provide the name of the registry (such as PROSPERO) and registration number                                                                                                                                                       | 2 & 9       |
| Authors:                           |         |                                                                                                                                                                                                                                                  |             |
| Contact                            | 3a      | Provide name, institutional affiliation, e-mail address of all protocol authors; provide physical mailing address of corresponding author                                                                                                        | 1           |
| Contributions                      | 3b      | Describe contributions of protocol authors and identify the guarantor of the review                                                                                                                                                              | 10          |
| Amendments                         | 4       | If the protocol represents an amendment of a previously completed or published protocol, identify as such and list changes; otherwise, state plan for documenting important protocol amendments                                                  | N/A         |
| Support:                           |         |                                                                                                                                                                                                                                                  |             |
| Sources                            | 5a      | Indicate sources of financial or other support for the review                                                                                                                                                                                    | 10          |
| Sponsor                            | 5b      | Provide name for the review funder and/or sponsor                                                                                                                                                                                                | 10          |
| Role of sponsor or funder          | 5c      | Describe roles of funder(s), sponsor(s), and/or institution(s), if any, in developing the protocol                                                                                                                                               | N/A         |
| <b>INTRODUCTION</b>                |         |                                                                                                                                                                                                                                                  |             |
| Rationale                          | 6       | Describe the rationale for the review in the context of what is already known                                                                                                                                                                    | 3-4         |
| Objectives                         | 7       | Provide an explicit statement of the question(s) the review will address with reference to participants, interventions, comparators, and outcomes (PICO)                                                                                         | 4           |
| <b>METHODS</b>                     |         |                                                                                                                                                                                                                                                  |             |
| Eligibility criteria               | 8       | Specify the study characteristics (such as PICO, study design, setting, time frame) and report characteristics (such as years considered, language, publication status) to be used as criteria for eligibility for the review                    | 5-6         |
| Information sources                | 9       | Describe all intended information sources (such as electronic databases, contact with study authors, trial registers or other grey literature sources) with planned dates of coverage                                                            | 6           |
| Search strategy                    | 10      | Present draft of search strategy to be used for at least one electronic database, including planned limits, such that it could be repeated                                                                                                       | 6           |
| Study records:                     |         |                                                                                                                                                                                                                                                  |             |
| Data management                    | 11a     | Describe the mechanism(s) that will be used to manage records and data throughout the review                                                                                                                                                     | 7           |
| Selection process                  | 11b     | State the process that will be used for selecting studies (such as two independent reviewers) through each phase of the review (that is, screening, eligibility and inclusion in meta-analysis)                                                  | 7           |
| Data collection process            | 11c     | Describe planned method of extracting data from reports (such as piloting forms, done independently, in duplicate), any processes for obtaining and confirming data from investigators                                                           | 7           |
| Data items                         | 12      | List and define all variables for which data will be sought (such as PICO items, funding sources), any pre-planned data assumptions and simplifications                                                                                          | 7           |
| Outcomes and prioritization        | 13      | List and define all outcomes for which data will be sought, including prioritization of main and additional outcomes, with rationale                                                                                                             | 6           |
| Risk of bias in individual studies | 14      | Describe anticipated methods for assessing risk of bias of individual studies, including whether this will be done at the outcome or study level, or both; state how this information will be used in data synthesis                             | 8           |
| Data synthesis                     | 15a     | Describe criteria under which study data will be quantitatively synthesised                                                                                                                                                                      | 8           |
|                                    | 15b     | If data are appropriate for quantitative synthesis, describe planned summary measures, methods of handling data and methods of combining data from studies, including any planned exploration of consistency (such as $I^2$ , Kendall's $\tau$ ) | 8           |
|                                    | 15c     | Describe any proposed additional analyses (such as sensitivity or subgroup analyses, meta-regression)                                                                                                                                            | 9           |
|                                    | 15d     | If quantitative synthesis is not appropriate, describe the type of summary planned                                                                                                                                                               | 9           |

# BMJ Open

## The Global Epidemiology of Viral-Induced Acute Liver Failure: A Systematic Review Protocol

|                                 |                                                                                                                                                                                                                                                                                                                                                                                                                                                                                                                                                                                                                                                                                                                                                                                                                                                                                                                                                                                                                                                                                                                                                                                                                                                                                                                                                                                                                |
|---------------------------------|----------------------------------------------------------------------------------------------------------------------------------------------------------------------------------------------------------------------------------------------------------------------------------------------------------------------------------------------------------------------------------------------------------------------------------------------------------------------------------------------------------------------------------------------------------------------------------------------------------------------------------------------------------------------------------------------------------------------------------------------------------------------------------------------------------------------------------------------------------------------------------------------------------------------------------------------------------------------------------------------------------------------------------------------------------------------------------------------------------------------------------------------------------------------------------------------------------------------------------------------------------------------------------------------------------------------------------------------------------------------------------------------------------------|
| Journal:                        | <i>BMJ Open</i>                                                                                                                                                                                                                                                                                                                                                                                                                                                                                                                                                                                                                                                                                                                                                                                                                                                                                                                                                                                                                                                                                                                                                                                                                                                                                                                                                                                                |
| Manuscript ID                   | bmjopen-2019-029819.R2                                                                                                                                                                                                                                                                                                                                                                                                                                                                                                                                                                                                                                                                                                                                                                                                                                                                                                                                                                                                                                                                                                                                                                                                                                                                                                                                                                                         |
| Article Type:                   | Protocol                                                                                                                                                                                                                                                                                                                                                                                                                                                                                                                                                                                                                                                                                                                                                                                                                                                                                                                                                                                                                                                                                                                                                                                                                                                                                                                                                                                                       |
| Date Submitted by the Author:   | 06-Jul-2019                                                                                                                                                                                                                                                                                                                                                                                                                                                                                                                                                                                                                                                                                                                                                                                                                                                                                                                                                                                                                                                                                                                                                                                                                                                                                                                                                                                                    |
| Complete List of Authors:       | Patterson, Jenna; University of Cape Town, School of Public Health & Family Medicine, Vaccines for Africa Initiative<br>Hussey, Hannah; University of Cape Town, School of Public Health & Family Medicine, Vaccines for Africa Initiative<br>Abdullahi, Leila; Save the Children International, Research, Evaluation, Analysis, Learning and Monitoring (REALM)<br>Sikal, Sheetal; University of Cape Town, Department of Statistical Sciences; University of Oxford, Nuffield Department of Medicine<br>Goddard, Liz; University of Cape Town, Department of Paediatrics, Red Cross War Memorial Children's Hospital<br>Setshedi, Mashiko; University of Cape Town, Department of Medicine, Division of Gastroenterology, Grootte Schuur Hospital<br>Spearman, Wendy ; University of Cape Town, Department of Medicine, Division of Hepatology, Grootte Schuur Hospital<br>Hussey, Gregory; University of Cape Town, School of Public Health & Family Medicine, Vaccines For Africa Initiative; University of Cape Town, Institute of Infectious Disease and Molecular Medicine<br>Kagina, Benjamin; University of Cape Town, School of Public Health & Family Medicine, Vaccines for Africa Initiative<br>Muloiwa, Rudzani; University of Cape Town, School of Public Health & Family Medicine, Vaccines for Africa Initiative; University of Cape Town, Department of Paediatrics, Grootte Schuur Hospital |
| <b>Primary Subject Heading</b>: | Epidemiology                                                                                                                                                                                                                                                                                                                                                                                                                                                                                                                                                                                                                                                                                                                                                                                                                                                                                                                                                                                                                                                                                                                                                                                                                                                                                                                                                                                                   |
| Secondary Subject Heading:      | Gastroenterology and hepatology, Infectious diseases                                                                                                                                                                                                                                                                                                                                                                                                                                                                                                                                                                                                                                                                                                                                                                                                                                                                                                                                                                                                                                                                                                                                                                                                                                                                                                                                                           |
| Keywords:                       | Epidemiology < INFECTIOUS DISEASES, acute liver failure, VIROLOGY                                                                                                                                                                                                                                                                                                                                                                                                                                                                                                                                                                                                                                                                                                                                                                                                                                                                                                                                                                                                                                                                                                                                                                                                                                                                                                                                              |
|                                 |                                                                                                                                                                                                                                                                                                                                                                                                                                                                                                                                                                                                                                                                                                                                                                                                                                                                                                                                                                                                                                                                                                                                                                                                                                                                                                                                                                                                                |

SCHOLARONE™  
Manuscripts



# PROTOCOL

## The Global Epidemiology of Viral-Induced Acute Liver Failure: A Systematic Review Protocol

Jenna Patterson<sup>1,2</sup>, Hannah Hussey<sup>1,2</sup>, Leila Abdullahi<sup>2,4</sup>, Sheetal Silal<sup>5</sup>, Liz Goddard<sup>6</sup>, Mashiko Setshedi<sup>7</sup>, Wendy Spearman<sup>7</sup>, Gregory D. Hussey<sup>1,8</sup>, Benjamin M. Kagina<sup>1,2</sup> and Rudzani Muloiwa<sup>1,6</sup>

<sup>1</sup>Vaccines for Africa Initiative, University of Cape Town, South Africa

<sup>2</sup>School of Public Health & Family Medicine, University of Cape Town, South Africa

<sup>3</sup>Department of Medicine, Groote Schuur Hospital, University of Cape Town, South Africa

<sup>4</sup>Save the Children International, Somalia/Somaliland Country Office, Nairobi, Kenya

<sup>5</sup>Modelling and Simulation Hub, Africa, Department of Statistical Sciences, Faculty of Science, University of Cape Town, South Africa

<sup>6</sup>Department of Paediatrics & Child Health, Red Cross War Memorial Children's Hospital, University of Cape Town

<sup>7</sup>Department of Medicine, Groote Schuur Hospital, University of Cape Town, South Africa

<sup>8</sup>Institute of Infectious Disease and Molecular Medicine, University of Cape Town, South Africa

*Corresponding author:* Jenna Patterson

*Corresponding author's email address:* pttjen005@myuct.ac.za

*Corresponding author's postal address:* Vaccines for Africa Initiative, Room N2.09A, Werner Beit North, Health Sciences Campus, Anzio Road, Observatory, 7925

Patterson, J et al.

For peer review only - <http://bmjopen.bmj.com/site/about/guidelines.xhtml>

## **ABSTRACT**

**Introduction:** The burden of viral-induced ALF around the world still remains unclear, with little to no data collected regarding the disease incidence in general and synthesised data on the relative contribution of different viruses to the aetiology of ALF is missing in the field. The aim of this review is to estimate the burden (prevalence, incidence, mortality, hospitalization) of ALF following infection *HAV, HBV, HCV, HDV, HEV, EBV, HSV1, HSV2, VZV, parvo-virus B19, HPIVs, YFV, HHV-6, CMV, CA16 and/or HAdVs*. Establishing the common aetiologies of viral-induced acute liver failure, which vary geographically, is important so that: a) treatment can be initiated quickly, b) contraindications to liver transplant can be identified, c) prognoses can be determined more accurately, and most importantly, d) vaccination against viral ALF aetiologies can be prioritised especially in under-resourced regions with public health risks associated with the relevant attributable diseases.

**Methods and analysis:** EBSCOhost, PubMed, ScienceDirect, Scopus and Web of Science databases will be searched for relevant literature published and grey literature from 2009 up to 2019. Published cross-sectional and cohort studies will be eligible for inclusion in this review. Qualifying studies will be formally assessed for quality and risk of bias using a standardised scoring tool. Following standardised data extraction, meta-analyses will be carried out using STATA. Depending on characteristics of included studies, subgroup analyses and meta-regression analyses will be performed. This review will be reported according to Preferred Reporting Items for Systematic reviews and Meta-Analyses (PRISMA) guidelines.

**Ethics and dissemination:** No ethics approval is required as the systematic review will use only published data already in the public domain. Findings will be disseminated through publication in a peer reviewed journal.

**Registration:** This protocol has been registered with the International Prospective Register of Systematic Reviews (PROSPERO), registration number CRD42018110309.

**Key words:** global, epidemiology, acute liver failure

### **Strengths and limitations of study:**

- Comprehensive and exhaustive search for relevant studies from several databases
- Comprehensive diagnostic inclusion criteria for acute liver failure cases according to international guidelines
- Paucity of data may lead to meta-analysis and/or meta-regression analysis not being possible for all global regions
- Diversity of viruses attributable to ALF cases may lead to low statistical power in meta-analysis

**MAIN TEXT****INTRODUCTION**

Acute liver failure (ALF) refers to a rare syndrome characterised by an acute liver injury resulting in encephalopathy (altered mentation) and coagulopathy (International Normalised Ratio (INR) >1.5 ) in individuals without known pre-existing liver disease and with an illness of <26 weeks duration (1). The syndrome was originally defined as fulminant liver failure or fulminant hepatic failure in 1970 but was re-defined as ALF in the early 1990s when the understanding of the multiple disease aetiologies, frequency of complications and prognosis of the condition further developed (2). Further sub-classifications of ALF include hyperacute, acute and subacute depending on the time in weeks from the development of jaundice to the development of hepatic encephalopathy (3).

The pathogenesis of ALF includes both direct and immune-mediated liver injury triggered by the disease aetiology (4). The aetiology of ALF determines the clinical course and progression of the disease and well as the need for specific therapy (5). Possible causes of ALF include viral infections, drugs and toxins, pregnancy related liver diseases (acute fatty liver of pregnancy, HELLP syndrome, preeclampsia), vascular causes (Budd-Chiari syndrome, ischaemic hepatitis) and malignancy (lymphoma, haemophagocytic lymphohistiocytosis). Wilsons disease, vertically-acquired hepatitis B and autoimmune hepatitis are included despite being chronic liver diseases if the diagnosis is made within 26 weeks (6).

Acute viral hepatitis (particularly acute hepatitis A and acute E) has been identified as the most common cause of ALF among all ages in Asia and Africa and the most common causes of ALF in children in Asia and South America (2, 4). The incidence of virally induced ALF has substantially declined in Europe, with only 19% of all ALF cases now related to viral infection (2). Vaccination has led to a significant drop in the incidence of acute hepatitis B induced ALF, with fewer than 4% of ALF cases now attributable to hepatitis B infection in Europe (2). Since the introduction of a universal one-dose hepatitis A vaccination program in Argentina, the number of acute hepatitis A induced ALF cases has decreased from 54.6% to 27.7% (7).

The most common causes of death in patients with ALF are cerebral oedema and multi-organ system failure (4). Mortality rates associated with ALF vary between 60% and 80%, depending on the disease aetiology as well as a patient's access to care (8, 9). Liver transplantation plays a central role in the management of ALF and remains the only definitive treatment for patients who fail to demonstrate spontaneous recovery (1). It remains difficult to predict which patients with ALF will require transplantation and models such as the "Model for End-stage Liver Disease" (MELD) have not improved the accuracy of these predictions (1). The King's College Criteria for emergency liver transplantation remains the most clinically useful, with a sensitivity of 68%-69% and a specificity of 82%-92% (10). Management of ALF cases accounts for 5-12% of all liver transplant activity in the United States and Europe (11). A large proportion of patients with ALF in both high and low resource settings, however, are

1  
2  
3 103 deemed to have contraindications to transplantation or deteriorate beyond transplantation before a donor liver is  
4 104 allocated (5, 11, 12).

5  
6  
7 105 The burden of viral-induced ALF around the world still remains unclear, with little to no data collected regarding  
8 106 the disease incidence in general (2). Epidemiological estimates around ALF are based purely on data from  
9 107 transplant units and the medical management of the condition remains poorly defined (1, 2). Establishing the  
10 108 common aetiologies of viral-induced ALF, which vary geographically, is important so that: a) treatment can be  
11 109 initiated quickly, b) contraindications to liver transplant can be identified, c) prognoses can be determined more  
12 110 accurately, and most important, d) vaccination against viral ALF aetiologies can be prioritised especially in under-  
13 111 resourced regions with public health risks associated with the relevant attributable diseases.

14 112  
15 113 To the best of our knowledge, no extensive systematic review of the global epidemiology of viral-induced ALF has  
16 114 previously been conducted. Furthermore, synthesised data on the relative contribution of different viruses to the  
17 115 aetiology of ALF is missing in the field. Hepatitis A is a major cause of ALF and the epidemiology of the disease is  
18 116 changing on a global scale. For example, it has been reported in many low and middle-income countries, that the  
19 117 epidemiology hepatitis A is transitioning from high to intermediate endemicity and this transition is associated  
20 118 with an increasing incidence of acute hepatitis A (13-15). This review aims to describe the global epidemiology of  
21 119 viral-induced ALF.

## 22 120 23 121 **Aim**

24 122 To estimate the burden (prevalence, incidence, mortality, hospitalization) of ALF following infection *HAV, HBV,*  
25 123 *HCV, HDV, HEV, EBV), HSV1, HSV2, VZV, parvo-virus B19, HPIVs, YFV, HHV-6, CMV, CA16 and/or HAdVs.*

## 26 124 27 125 **METHODS**

### 28 126 **Patient and Public Involvement**

29 127 This research question was developed as part of an ongoing project by the research team that aims to generate  
30 128 evidence to facilitate evidence-based decision making of introducing routine hepatitis A vaccination in South  
31 129 Africa. The findings of this review will contribute to the knowledge base that aims to enhance global vaccination  
32 130 strategies against viral-associated ALF. As this is a systematic review, no patient involvement will be required;  
33 131 however, it is hoped that the findings of this review will help to highlight the burden that acute liver failure places  
34 132 on populations without routine hepatitis A vaccination. Findings will be disseminated through publication in a peer  
35 133 reviewed journal and included in a technical policy dossier distributed to the National Advisory Group on  
36 134 Immunisation in South Africa.

37 135

38 136

1  
2  
3 137 **Criteria for considering studies for this review**

4 138 **Types of studies**

5  
6 139 Only published cross-sectional, surveillance and cohort studies will be eligible for inclusion in this review.

7  
8 140

9 141 **Types of participants**

10 142 Patients of any age with any of the following viral infections: hepatitis A virus (HAV), hepatitis B virus (HBV),  
11 143 hepatitis C virus (HCV), hepatitis D virus (HDV), hepatitis E virus (HEV), epstein-barr virus (EBV), herpes simplex  
12 144 virus-1 (HSV1), herpes simplex virus-2 (HSV2), varicella-zoster virus (VZV), parvo-virus B19, human parainfluenza  
13  
14 145 viruses (HPIVs), yellow fever virus (YFV), human herpesvirus 6 (HVV-6), cytomegalovirus (CMV), coxsackievirus  
15 146 (CA16) and adenovirus (HAdVs).

16  
17 147

18  
19  
20 148 **Case definition**

21 149 Included studies must have a clearly stated case definition of viral-induced acute liver failure. Cases must be  
22  
23 150 confirmed by both clinical and laboratory diagnostic methods.

24 151

- Clinical diagnosis of ALF will be defined as follows for children and adults presenting with an acute liver  
25  
26 152 injury:

27 153

- Children – The absence of known, chronic liver disease with liver-based coagulopathy not  
28  
29 154 responsive to parenteral vitamin K and an international normalised ratio (INR)  $\geq 1.5$  in the  
30  
31 155 presence of clinical evidence of encephalopathy or INR of  $\geq 2.0$  without clinical signs of  
32 156 encephalopathy (16)

33 157

- Adults – Liver-based coagulopathy (INR  $\geq 1.5$ ) and any grade of hepatic encephalopathy (HE) as  
34  
35 158 defined by the West Haven criteria within 26 weeks after the onset of symptoms but with no  
36  
37 159 evidence of chronic liver disease, including cirrhosis (1, 17)

38 160

- Serological, molecular or culture laboratory confirmation of infection with HAV, HBV, HCV, HDV, HEV,  
39  
40 161 EBV), HSV1, HSV2, VZV, parvo-virus B19, HPIVs, YFV, HVV-6, CMV, CA16 or HAdVs.

41 162

42 163 **Exclusion criteria**

43  
44 164 Studies will be excluded from this review if they do not report any of the primary outcomes listed or do not match  
45 165 the clearly stated case definition of viral-induced acute liver failure given for this review.

46  
47 166

48 167

49  
50 168

51 169

52  
53 170

54  
55 171

172

173 **Outcomes**

174 For ALF following infection with HAV, HBV, HCV, HDV, HEV, EBV), HSV1, HSV2, VZV, parvo-virus B19, HPIVs, YFV,  
 175 HHV-6, CMV, CA16 and/or HAdVs:

- 176 • Prevalence and incidence of ALF
- 177 • Mortality rate following ALF
- 178 • Prevalence and incidence of requirement for liver transplant
- 179 • Mean hospital stay for patients with ALF

180

181 **Search Methods**

182 The literature search strategy will use both text words and medical subject heading (MeSH) terms (all fields). It will  
 183 include the following terms: epidemiology, prevalence, incidence, burden, mortality, morbidity, fulminant hepatic  
 184 failure, fulminant liver failure, acute hepatic failure, acute liver failure, Hepatitis A virus (HAV), hepatitis B virus  
 185 (HBV), hepatitis C virus (HCV), hepatitis D virus (HDV), hepatitis E virus (HEV), epstein-barr virus (EBV), herpes  
 186 simplex virus-1 (HSV1), herpes simplex virus-2 (HSV2), varicella-zoster virus (VZV), parvo-virus B19, human  
 187 parainfluenza viruses (HPIVs), yellow fever virus (YFV), human herpesvirus 6 (HHV-6), cytomegalovirus (CMV) and  
 188 coxsackie virus. These terms will be adapted for use in each defined database and combined with relevant filters  
 189 for time period of studies eligible for inclusion in the review. **Table 1** shows an example search strategy for use in  
 190 PubMed. Each adapted search strategy for use in the outlined databases will be piloted by JP and HH to ensure the  
 191 outputs retrieved are relevant to the review objectives.

192

193 The following electronic databases will be searched from 2009 up to 2019 for relevant published literature:  
 194 EBSCOhost, PubMed, ScienceDirect, Scopus and Web of Science. The starting date of 2009 was chosen as *Bernal et*  
 195 *al. 2010* completed searched Medline with the terms “acute liver failure” and “fulminant hepatic failure” between  
 196 1997 and 2009, which provided a review of the most relevant publications to practice. No language restriction will  
 197 be places on the search for studies (8).

198

| Table 1: Search strategy for use in PUBMED |            |                                                                                                                                                                                                                                                                                                                                                                                                                                                  |
|--------------------------------------------|------------|--------------------------------------------------------------------------------------------------------------------------------------------------------------------------------------------------------------------------------------------------------------------------------------------------------------------------------------------------------------------------------------------------------------------------------------------------|
| Query                                      | Fields     | Search term                                                                                                                                                                                                                                                                                                                                                                                                                                      |
| #1                                         | All fields | epidemiology OR prevalence OR incidence OR burden OR mortality OR morbidity                                                                                                                                                                                                                                                                                                                                                                      |
| #2                                         | All fields | fulminant OR acute                                                                                                                                                                                                                                                                                                                                                                                                                               |
| #3                                         | All fields | hepatic failure OR liver failure                                                                                                                                                                                                                                                                                                                                                                                                                 |
| #4                                         | All fields | hepatitis a virus OR HAV OR hepatitis b virus OR HBV OR hepatitis c virus OR HCV OR HCV OR hepatitis d virus OR HDV OR hepatitis e virus OR HEV OR epstein-barr virus OR EBV OR herpes simplex virus-1 OR HSV1 OR herpes simplex virus-2 OR HSV2 OR varicella-zoster virus OR VZV OR parvovirus b19 OR human parainfluenza viruses OR yellow fever virus OR YFV OR human herpesvirus 6 OR HHV-6 OR cytomegalovirus OR CMV OR adenovirus OR HAdVs |

|    |            |                                |
|----|------------|--------------------------------|
| #5 | All fields | humans                         |
| #6 | N/A        | #1 AND #2 AND #3 AND #4 AND #5 |

### 199 **Selection of studies**

200 All electronic database outputs will be imported to Rayyan Software for screening and selection. The first and  
 201 second author will independently screen 100% titles and abstracts for inclusion of potentially eligible trials sourced  
 202 database searches. Titles and abstracts in non-English languages will be translated into English using Google  
 203 Translate. HH will collect full-text trials reports/publications of potentially eligible studies and then HH and JP will  
 204 independently screen 100% of full-text articles for inclusion. Where disagreement may occur between the two  
 205 authors, the last author (RM) will be consulted. We will record the selection process with reasons for exclusion  
 206 using a PRISMA flow diagram.

### 208 **Data extraction and dealing with missing data**

209 Two authors (JP and HH) will independently extract data from the included studies on a standardised, pre-designed  
 210 extraction form. In the event of any disagreement between the two authors, a third author (RM) will be consulted.  
 211 In the case where non-English studies are selected for inclusion in the review, GoogleTranslate will be used to  
 212 allow for data extraction (18). In the event that data are missing, we will contact the investigators or study  
 213 sponsors to obtain the missing data. In the event of no reply within one month, we will exclude the study from the  
 214 outcome respective to the missing data. Studies awaiting missing data requests will be marked as “awaiting  
 215 classification” in the table of included studies.

217 The following information will be extracted from the included studies:

- 218 • Study characteristics: year of publication, study design, sample size and objectives of study
- 219 • Study population: country, WHO region, country income level, hepatitis A vaccination program (yes or no)
- 220 • Case definition: clinical case definition and laboratory confirmation methods and the type of virus or viruses  
 221 indicated as the causative agent for the condition
- 222 • Case characteristics: age, gender, hepatitis A vaccination status, country of residence and immune suppressive  
 223 conditions (e.g. HIV, cancer and diabetes, immunosuppression, chemotherapy)

### 225 **Data management**

226 Data management will be the responsibility of the first author (JP) in consultation with SS, BMK and RM. An  
 227 electronic parent folder with the name of this study will be created. Subfolders will also be created to keep the  
 228 details of different tasks completed such as all records retrieved, records included and excluded, risk of bias  
 229 assessment results, analyses and full systematic review manuscript drafts. Two back-ups of the parent folder will  
 230 be created and stored on a memory stick and a hard drive.

231

1  
2  
3 232

4 233

5 234 **Risk of bias assessment of included studies**

6 235 Two review authors will independently assess the risk of bias for each included study using the Cochrane domain-  
7 236 based evaluation for experimental studies and the 2012 Hoy *et al.*, tool for observational studies (19, 20). In case  
8 237 of disagreement, a third author will be consulted to resolve the inconsistencies. A version of *Hoy et al.*, tool is  
9 238 shown in **Appendix 1**. For included experimental study, we will report bias assessments in the form of a risk of bias  
10 239 graphs created in RevMan (21). For included observational studies, we report risk of bias together with a  
11 240 descriptive summary of the information that influenced our judgment in a risk of bias table. We will judge  
12 241 observational studies as having 'low risk', 'unclear risk' or 'high risk' of bias.

13 242

14 243 **Assessment of heterogeneity**

15 244 We will use forest plots to assess the presence of statistical heterogeneity. We will assess heterogeneity by  
16 245 calculating  $\text{Chi}^2$  (threshold  $P > 0.1$ ) and  $I^2$  statistics (threshold  $I^2 > 40\%$ ). The values of  $I^2$  will be categorised for  
17 246 heterogeneity as follow: "not important" (0 to 40%), "moderate" (41 to 60%) and "considerable" (61 to 80%) and  
18 247 "substantial" (81 to 100%). Where "not important" or "moderate" heterogeneity exists between studies ( $I^2 \leq$   
19 248 40%), the outcomes will be pooled in a meta-analysis and reported using forest plots. Where "considerable" or  
20 249 "substantial" heterogeneity exists between studies ( $I^2 > 40\%$ ), the outcomes will be reported in narrative form and  
21 250 displayed using forest plots.

22 251

23 252 **Assessment of reporting biases**

24 253 A funnel plot will be constructed to assess the risk of publication bias included in the meta-analysis with over 10  
25 254 studies of varying sizes. The funnel plot will be examined for asymmetry visually and statistically using the Egger  
26 255 test (22).

27 256

28 257 **Data synthesis**

29 258 Proportions as percentages will be used to represent measures of frequency prioritised by the primary and  
30 259 secondary outcomes of the review. Included studies for each analysis will be assessed for heterogeneity using the  
31 260  $I^2$  statistic. Where sufficient homogeneity exists ( $I^2 < 50\%$ ) between studies, data will be pooled in a meta-  
32 261 analysis. Prevalence data from individual studies will be pooled together using random-effects meta-analysis. The  
33 262 pooled estimates will be calculated after a Freeman-Tukey double arcsine transformation and presented in forest  
34 263 plots. For incidence data, meta-analysis models will be applied using the log incidence rates and the corresponding  
35 264 standard errors. The pooled data will be reverse transformed and presented in forest plots. For rare events,  
36 265 incidences will be pooled using Poisson based mixed-effects models. Both outcome measures will be reported with  
37 266 uncertainty expressed using 95% confidence intervals (CI). Where data are too heterogeneous ( $I^2 \geq 50\%$ ),



267 outcome estimates will be reported narratively. STATA software V.14 (STATA Corporation, College Stations, Texas,  
268 USA) will be used to compute all statistical analyses in this review.

269

### 270 ***Subgroup analysis***

271 Where sufficient data exists, subgroup analyses will be conducted according to the groupings below. Meta-  
272 regression analyses will be conducted for all sub-groups where there are  $\geq 10$  studies for inclusion in the analysis.

- 273 • Study design
- 274 • Age-groups (1 to 5 years old, 6 to 10 years old, 11 to 15 years old, 16 to 20 years old, 21 to 30 years old,  
275 31 to 40 years old, 41 to 50 years old, 51 to 60 years old, > 60 years old)
  - 276 • These age groups have been used as individuals > 60 years old are considered “elderly” in the  
277 acute liver failure literature reviewed
- 278 • HIV status (not exposed/not infected, exposed/not-infected, infected)
- 279 • Country
- 280 • WHO region
- 281 • Countries with and without routine hepatitis A vaccination programs
- 282 • Length of routine hepatitis A vaccination in a country

283

### 284 ***Sensitivity analysis***

285 Inclusion/exclusion analyses will be performed in order to assess the potential impact of risk of bias on the  
286 robustness of outcome estimates. We will conduct analyses to provide three estimates of intervention effects in  
287 respect to bias; outcome estimates with inclusion of only studies at low risk of bias, outcome estimates with  
288 inclusion of only studies at high risk of bias and outcome estimates with inclusion of all studies. Where  
289 inconsistencies exist between outcome estimates with inclusion of only studies at low risk of bias and the outcome  
290 estimates of only studies at high risk or all included studies, these inconsistencies will be reported. Further,  
291 outcome estimates of studies at low and high risk will be interpreted separately in the review.

292

### 293 ***Reporting of the review***

294 This review will be reported according to Preferred Reporting Items for Systematic reviews and Meta-Analyses  
295 (PRISMA) guidelines (**Appendix 2**). The study selection process will be summarised using a PRISMA flow diagram.  
296 Tables will be used to summarise both qualitative and quantitative data from individual studies included in the  
297 review. Quantitative data from the review will be presented using narrative descriptions, forest plots and graphs  
298 where relevant.

299

### 300 ***Systematic Review Registration***

1  
2  
3 301 This protocol has been registered with the International Prospective Register of Systematic Reviews (PROSPERO),  
4 302 registration number (CRD42018110309).

5  
6 303

7  
8 304

9  
10 305 **Ethics and dissemination**

11 306 No ethics approval is required as the systematic review will use only published data already in the public domain.

12 307 Findings will be disseminated through publication in a peer reviewed journal.

13  
14 308

15  
16 309 **Author's contributions**

17 310 JP, GDH, BMK and RM conceived this study. JP developed the study protocol with the help of BMK and RM. JP will

18 311 implement the review under the supervision of RM. JP and HH will perform the study search, screening, and

19 312 extraction of data under the guidance of RM. LA and BMK will provide methodological expertise for this review. SS,

20 313 LG, WS, MS and GDH will provide content expertise for this review and all authors will provide comments on the

21 314 final manuscript before publication. JP will be the guarantor of this review.

22  
23 315

24  
25  
26 316 **Funding**

27 317 This research received no specific grant from any funding agency in the public, commercial or not-for-profit

28 318 sectors. The Vaccines for Africa Initiative (VACFA) has funded the costs associated with the research and

29 319 dissemination of the results, including publications.

30  
31 320

32  
33 321 **Competing interests**

34 322 None declared.

35  
36 323

37  
38 324

39  
40  
41  
42  
43  
44  
45  
46  
47  
48  
49  
50  
51  
52  
53  
54  
55  
56  
57  
58  
59  
60

1  
2  
3 325  
4  
5 326  
6 327  
7 328  
8 329  
9 330  
10 331  
11 332  
12 333  
13 334  
14 335  
15 336  
16 337  
17 338  
18 339  
19 340  
20 341  
21 342  
22 343  
23 344  
24 345  
25 346  
26 347  
27 348  
28 349  
29 350  
30 351  
31 352  
32 353  
33 354  
34 355  
35 356  
36 357  
37 358  
38 359  
39 360  
40 361  
41 362  
42 363  
43 364  
44 365  
45 366  
46 367

## REFERENCES

1. Lee WM, Stravitz RT, Larson AM. Introduction to the revised American Association for the Study of Liver Diseases Position Paper on acute liver failure 2011. *Hepatology*. 2012;55(3):965-7.
2. European Association for the Study of the Liver. Electronic address eee, Clinical practice guidelines p, Wendon J, Panel m, Cordoba J, Dhawan A, et al. EASL Clinical Practical Guidelines on the management of acute (fulminant) liver failure. *J Hepatol*. 2017;66(5):1047-81.
3. O'Grady J, Schalm S, Williams R. Acute liver failure: redefining the syndromes. *Lancet*. 1993;342(8866):273-5.
4. Morabito V, Adebayo D. Fulminant Hepatitis: Definitions, Causes and Management. *Health*. 2014;06(10):1038-48.
5. O'Grady JG. Acute liver failure. *Postgrad Med J*. 2005;81(953):148-54.
6. Mayo Clinic. Acute liver failure 2017 [updated 29 August 2017. Available from: <https://www.mayoclinic.org/diseases-conditions/acute-liver-failure/symptoms-causes/syc-20352863>.
7. Cervio G, Trentadue J, D'Agostino D, Luque C, Giorgi M, Armoni J, et al. Decline in HAV-associated fulminant hepatic failure and liver transplant in children in Argentina after the introduction of a universal hepatitis A vaccination program. *Hepat Med*. 2011;3:99-106.
8. Bernal W, Auzinger G, Dhawan A, Wendon J. Acute liver failure. *Lancet*. 2010;376(Seminar):190-201.
9. Wlodzimirow KA, Eslami S, Abu-Hanna A, Nieuwoudt M, Chamuleau RA. Systematic review: acute liver failure - one disease, more than 40 definitions. *Aliment Pharmacol Ther*. 2012;35(11):1245-56.
10. McPhail M, Wendon J, Bernal W. Meta-analysis of performance of King's College Hospital Criteria in prediction of outcome in nonparacetamol-induced acute liver failure. *J Hepatol*. 2010;53:492-9.
11. O'Grady J. Liver transplantation for acute liver failure. *Best Pract Res Clin Gastroenterol*. 2012;26(1):27-33.
12. Spearman CW, McCulloch M, Millar AJ, Burger H, Numanoglu A, Goddard E, et al. Liver transplantation at Red Cross War Memorial Children's Hospital. *South African medical journal = Suid-Afrikaanse tydskrif vir geneeskunde*. 2006;96(9 Pt 2):960-3.
13. Mazanderani AH, Motaze VN, McCarthy K, Suchard M, du Plessis NM. Hepatitis A Virus Seroprevalence in South Africa-Estimates using Routine Laboratory Data, 2005-2015. 2018.
14. Jacobsen KH, Koopman JS. The effects of socioeconomic development on worldwide hepatitis A virus seroprevalence patterns. *Int J Epidemiol*. 2005;34(3):600-9.
15. Nelson KE. Global changes in the epidemiology of hepatitis A virus infections. *Clinical Infectious Diseases*. 2006;42(Editorial commentary).
16. Smith SK, Rosenthal P. Pediatric liver failure: we came, we saw, but have we conquered? *F1000Res*. 2017;6:1540.
17. Ganger DR, Rule J, Rakela J, Bass N, Reuben A, Stravitz RT, et al. Acute Liver Failure of Indeterminate Etiology: A Comprehensive Systematic Approach by An Expert Committee to Establish Causality. *Am J Gastroenterol*. 2018.
18. Balk E, Ching M, Chen M, Trikalinos T, L KWC. Assessing the Accuracy of Google Translate to Allow Data Extraction From Trials Published in Non-English Languages. Rockville, USA: Agency for Healthcare Research and Quality; 2013 Jan 2013. Contract No.: EHC145-EF.
19. Hoy D, Brooks P, Woolf A, Blyth F, March L, Bain C. Assessing risk of bias in prevalence studies: Modification of an existing tool and evidence of interrater agreement. *Journal of Clinical Epidemiology*. 2012;65:934-9.
20. Werfalli M, Musekiwa A, Engel ME, Ross I, Kengne AP, Levitt NS. The prevalence of type 2 diabetes mellitus among older people in Africa: a systematic review study protocol. *BMJ Open*. 2014.
21. Review Manager. Copenhagen2014.
22. Egger M, Smith DG, Schneider M, Minder C. Bias in meta-analyses detected by a simple, graphical test. *BMJ*. 1997;315(7109):629-34.

1  
2  
3 **Appendix 1**  
4

5 **Hoy et. al/ Risk of bias and quality assessment tool for prevalence studies**  
6

7  
8  
9  
10  
11  
12  
13  
14  
15  
16  
17  
18  
19  
20  
21  
22  
23  
24  
25  
26  
27  
28  
29  
30  
31  
32  
33  
34  
35  
36  
37  
38  
39  
40  
41  
42  
43  
44  
45  
46  
47  
48  
49  
50  
51  
52  
53  
54  
55  
56  
57  
58  
59  
60

| External validity                                                                                                         | Score               |
|---------------------------------------------------------------------------------------------------------------------------|---------------------|
| 1. Was the study's target population a close representation of the national population in relation to relevant variables? | 1 Point             |
| 2. Was the sampling frame a true or close representation of the target population?                                        | 1 point             |
| 3. Was some form of random selection used to select the sample, or was a census undertaken?                               | 1 point             |
| 4. Was the likelihood of non-response bias minimal?                                                                       | 1 point             |
| <b>Total</b>                                                                                                              | <b>___/4 points</b> |
| Internal validity                                                                                                         | Score               |
| 1. Were data collected directly from the participants (as opposed to a proxy)?                                            | 1 point             |
| 2. Was an acceptable case definition used in the study?                                                                   | 1 point             |
| 3. Was the study instrument that measured the parameter of interest shown to have validity and reliability?               | 1 point             |
| 4. Was the same mode of data collection used for all participants?                                                        | 1 point             |
| 5. Was the length of the shortest prevalence period for the parameter of interest appropriate?                            | 1 point             |
| 6. Were the numerator(s) and denominator(s) for the parameter of interest appropriate?                                    | 1 point             |
| <b>Total</b>                                                                                                              | <b>___/6 points</b> |

## Appendix 2

## PRISMA-P Checklist

| Section and topic                  | Item No | Checklist item                                                                                                                                                                                                                                   | (Page No.#) |
|------------------------------------|---------|--------------------------------------------------------------------------------------------------------------------------------------------------------------------------------------------------------------------------------------------------|-------------|
| <b>ADMINISTRATIVE INFORMATION</b>  |         |                                                                                                                                                                                                                                                  |             |
| Title:                             |         |                                                                                                                                                                                                                                                  |             |
| Identification                     | 1a      | Identify the report as a protocol of a systematic review                                                                                                                                                                                         | 1           |
| Update                             | 1b      | If the protocol is for an update of a previous systematic review, identify as such                                                                                                                                                               | N/A         |
| Registration                       | 2       | If registered, provide the name of the registry (such as PROSPERO) and registration number                                                                                                                                                       | 2 & 9       |
| Authors:                           |         |                                                                                                                                                                                                                                                  |             |
| Contact                            | 3a      | Provide name, institutional affiliation, e-mail address of all protocol authors; provide physical mailing address of corresponding author                                                                                                        | 1           |
| Contributions                      | 3b      | Describe contributions of protocol authors and identify the guarantor of the review                                                                                                                                                              | 10          |
| Amendments                         | 4       | If the protocol represents an amendment of a previously completed or published protocol, identify as such and list changes; otherwise, state plan for documenting important protocol amendments                                                  | N/A         |
| Support:                           |         |                                                                                                                                                                                                                                                  |             |
| Sources                            | 5a      | Indicate sources of financial or other support for the review                                                                                                                                                                                    | 10          |
| Sponsor                            | 5b      | Provide name for the review funder and/or sponsor                                                                                                                                                                                                | 10          |
| Role of sponsor or funder          | 5c      | Describe roles of funder(s), sponsor(s), and/or institution(s), if any, in developing the protocol                                                                                                                                               | N/A         |
| <b>INTRODUCTION</b>                |         |                                                                                                                                                                                                                                                  |             |
| Rationale                          | 6       | Describe the rationale for the review in the context of what is already known                                                                                                                                                                    | 3-4         |
| Objectives                         | 7       | Provide an explicit statement of the question(s) the review will address with reference to participants, interventions, comparators, and outcomes (PICO)                                                                                         | 4           |
| <b>METHODS</b>                     |         |                                                                                                                                                                                                                                                  |             |
| Eligibility criteria               | 8       | Specify the study characteristics (such as PICO, study design, setting, time frame) and report characteristics (such as years considered, language, publication status) to be used as criteria for eligibility for the review                    | 5-6         |
| Information sources                | 9       | Describe all intended information sources (such as electronic databases, contact with study authors, trial registers or other grey literature sources) with planned dates of coverage                                                            | 6           |
| Search strategy                    | 10      | Present draft of search strategy to be used for at least one electronic database, including planned limits, such that it could be repeated                                                                                                       | 6           |
| Study records:                     |         |                                                                                                                                                                                                                                                  |             |
| Data management                    | 11a     | Describe the mechanism(s) that will be used to manage records and data throughout the review                                                                                                                                                     | 7           |
| Selection process                  | 11b     | State the process that will be used for selecting studies (such as two independent reviewers) through each phase of the review (that is, screening, eligibility and inclusion in meta-analysis)                                                  | 7           |
| Data collection process            | 11c     | Describe planned method of extracting data from reports (such as piloting forms, done independently, in duplicate), any processes for obtaining and confirming data from investigators                                                           | 7           |
| Data items                         | 12      | List and define all variables for which data will be sought (such as PICO items, funding sources), any pre-planned data assumptions and simplifications                                                                                          | 7           |
| Outcomes and prioritization        | 13      | List and define all outcomes for which data will be sought, including prioritization of main and additional outcomes, with rationale                                                                                                             | 6           |
| Risk of bias in individual studies | 14      | Describe anticipated methods for assessing risk of bias of individual studies, including whether this will be done at the outcome or study level, or both; state how this information will be used in data synthesis                             | 8           |
| Data synthesis                     | 15a     | Describe criteria under which study data will be quantitatively synthesised                                                                                                                                                                      | 8           |
|                                    | 15b     | If data are appropriate for quantitative synthesis, describe planned summary measures, methods of handling data and methods of combining data from studies, including any planned exploration of consistency (such as $I^2$ , Kendall's $\tau$ ) | 8           |
|                                    | 15c     | Describe any proposed additional analyses (such as sensitivity or subgroup analyses, meta-regression)                                                                                                                                            | 9           |
|                                    | 15d     | If quantitative synthesis is not appropriate, describe the type of summary planned                                                                                                                                                               | 9           |
