# Supplementary material for: The global epidemiology of viral-induced acute liver failure: a systematic review protocol
Source: PubMed Central journal article supplement — BMJ Open. 2019 Aug 30;9(8):e029819. doi: 10.1136/bmjopen-2019-029819 (PMC6720318; doi:10.1136/bmjopen-2019-029819), 2019-08-30
Supplement: bmjopen-2019-029819supp001.pdf [file bmjopen-2019-029819supp001.pdf]

**Appendix 1****Hoy et. al** Risk of bias and quality assessment tool for prevalence studies

| <b>External validity</b>                                                                                                  | <b>Score</b>       |
|---------------------------------------------------------------------------------------------------------------------------|--------------------|
| 1. Was the study's target population a close representation of the national population in relation to relevant variables? | 1 Point            |
| 2. Was the sampling frame a true or close representation of the target population?                                        | 1 point            |
| 3. Was some form of random selection used to select the sample, or was a census undertaken?                               | 1 point            |
| 4. Was the likelihood of non-response bias minimal?                                                                       | 1 point            |
| <b>Total</b>                                                                                                              | <b>__/4 points</b> |
| <b>Internal validity</b>                                                                                                  | <b>Score</b>       |
| 1. Were data collected directly from the participants (as opposed to a proxy)?                                            | 1 point            |
| 2. Was an acceptable case definition used in the study?                                                                   | 1 point            |
| 3. Was the study instrument that measured the parameter of interest shown to have validity and reliability?               | 1 point            |
| 4. Was the same mode of data collection used for all participants?                                                        | 1 point            |
| 5. Was the length of the shortest prevalence period for the parameter of interest appropriate?                            | 1 point            |
| 6. Were the numerator(s) and denominator(s) for the parameter of interest appropriate?                                    | 1 point            |
| <b>Total</b>                                                                                                              | <b>__/6 points</b> |
